# Supplementary material for: Macrophages exert homeostatic actions in pregnancy to protect against preterm birth and fetal inflammatory injury
Source: JCI Insight. 2021 Oct 8;6(19):e146089. doi: 10.1172/jci.insight.146089 (PMC8525593; doi:10.1172/jci.insight.146089)
Supplement: Supplemental data [file jciinsight-6-146089-s126.pdf]

Supplementary Information for

## **Macrophages exert homeostatic actions in pregnancy to protect against preterm birth and fetal inflammatory injury**

**Authors:** Nardhy Gomez-Lopez<sup>1-4</sup>, Valeria Garcia-Flores<sup>2,3</sup>, Peck Yin Chin<sup>1</sup>, Holly M. Groome<sup>1</sup>, Melanie T. Bijland<sup>1</sup>, Kerrilyn R. Diener<sup>1,5</sup>, Roberto Romero<sup>2,6-10</sup>, Sarah A. Robertson<sup>1</sup>

<sup>1</sup>Robinson Research Institute and Adelaide Medical School, The University of Adelaide, Adelaide, South Australia, AU

<sup>2</sup>Perinatology Research Branch, Division of Obstetrics and Maternal-Fetal Medicine, Division of Intramural Research, *Eunice Kennedy Shriver* National Institute of Child Health and Human Development, National Institutes of Health, U.S. Department of Health and Human Services (NICHD/NIH/DHHS); Bethesda, Maryland, and Detroit, Michigan, USA

<sup>3</sup>Department of Obstetrics and Gynecology, Wayne State University School of Medicine, Detroit, Michigan, USA

<sup>4</sup>Department of Biochemistry, Microbiology and Immunology, Wayne State University School of Medicine, Detroit, Michigan, USA

<sup>5</sup>University of South Australia Cancer Research Institute, Clinical and Health Sciences, University of South Australia, Adelaide, South Australia, AU

<sup>6</sup>Department of Obstetrics and Gynecology, University of Michigan, Ann Arbor, MI, USA.

<sup>7</sup>Department of Epidemiology and Biostatistics, Michigan State University, East Lansing, MI, USA

<sup>8</sup>Center for Molecular Medicine and Genetics, Wayne State University, Detroit, MI, USA.

<sup>9</sup>Detroit Medical Center, Detroit, MI, USA

<sup>10</sup>Department of Obstetrics and Gynecology, Florida International University, Miami, FL, USA

### **Corresponding author:**

Sarah A Robertson, PhD, Robinson Research Institute, Adelaide School of Medicine, University of Adelaide, Adelaide Health and Medical Sciences Building, North Terrace, Adelaide SA 5005, Australia, T: +61 8 8313 4094, E-mail: [sarah.robertson@adelaide.edu.au](mailto:sarah.robertson@adelaide.edu.au)

Nardhy Gomez-Lopez, PhD, Department of Obstetrics and Gynecology, Wayne State University, School of Medicine, Perinatology Research Branch, NICHD/NIH/DHHS, 275 E Hancock St, Detroit, Michigan 48201 USA, Tel: 313-577-8904, Email: [nardhy.gomez-lopez@wayne.edu](mailto:nardhy.gomez-lopez@wayne.edu)

### **This PDF file includes:**

SI Materials and Methods

Supplementary Figures 1 to 11

Supplementary Tables 1 to 5

## SI Materials and Methods

### Human subjects, clinical specimens, and definitions

Human decidual tissues samples were collected at Hutzel Women's Hospital in the Detroit Medical Center, Detroit, MI, USA, in partnership with Wayne State University School of Medicine and the Perinatology Research Branch, an intramural program of the *Eunice Kennedy Shriver* National Institute of Child Health and Human Development, National Institutes of Health, US Department of Health and Human Services (NICHD/NIH/DHHS), Detroit, MI, USA. The study groups included women who delivered at term, women with spontaneous preterm birth, and women with iatrogenic preterm birth. Term birth was defined as delivery after 37 weeks of gestation whereas preterm birth occurred before 37 weeks of gestation. Gestational age was determined by the date of the last menstrual period and confirmed by ultrasound examination. Spontaneous preterm birth was defined as delivery following the spontaneous onset of labor. Patients with multiple births or neonates that had congenital or chromosomal abnormalities were excluded from this study. The demographic and clinical characteristics of the study populations are shown in Table 1 and Supplementary Table 1.

### Isolation of human decidual leukocytes

Leukocytes were isolated from decidual tissues of each study group, as previously described (1). Briefly, the decidua basalis and the decidua parietalis were homogenized using a gentleMACS Dissociator (Miltenyi Biotec, San Diego, CA, USA) in StemPro Accutase Cell Dissociation Reagent (Life Technologies, Carlsbad, CA, USA) and incubated for 45 minutes (min) at 37°C with gentle agitation. After incubation, tissues were washed in phosphate-buffered saline (PBS) (Life Technologies) and filtered through a 100 µm cell strainer (Falcon; Corning Life Sciences, Durham, NC, USA). The resulting cell suspension was centrifuged at 300 x g for 10 min at 4°C. Decidual leukocytes were then separated by density gradient using Ficoll-Paque Plus (GE Healthcare Biosciences, Uppsala, Sweden). Cells collected from the mononuclear layer of the density gradient were washed with PBS and immediately used for immunophenotyping.

### Immunophenotyping of human decidual macrophage subsets

Isolated decidual mononuclear cells were incubated with 20 µL of human FcR blocking reagent (Miltenyi Biotec) in 80 µL of stain buffer (Cat#554656; BD Biosciences, San Jose, CA, USA) for 10 min at 4°C, then incubated with fluorochrome-conjugated anti-human monoclonal antibodies for 30 min at 4°C in the dark (Supplementary Table 2). After extracellular staining, the cells were washed with PBS to remove excess antibody, resuspended in 0.5 mL stain buffer, and acquired using the BD LSR II Flow Cytometer (BD Biosciences) and BD FACSDiva 6.0 software (BD Biosciences). For intracellular staining, the cells were then fixed and permeabilized using the BD Cytofix/Cytoperm™ Fixation and Permeabilization Solution (BD Biosciences). Next, the cells were washed with BD Perm/Wash™ Buffer (BD Biosciences), re-suspended in 50 µL of the same buffer, and stained with intracellular antibodies for 30 min at 4°C in the dark (Supplementary Table 2). Finally, the stained cells were washed with BD Perm/Wash™ Buffer, re-suspended in 0.5 ml stain buffer, and acquired using the BD™ LSR II Flow Cytometer and BD™ FACSDiva 6.0 software. Data analysis was performed using FlowJo software version 10 (FlowJo, Ashland, OR, USA).

### Mice

*Cd11b<sup>DTR/DTR</sup>* mice expressing the simian diphtheria toxin receptor (DTR) driven by the *Cd11b* promoter on an inbred FVB/N background (Tg[ITGAM-DTR/EGFP]34Lan) (2, 3) were provided by Richard Lang (University of Cincinnati, Cincinnati, Ohio, USA). *Cd11b<sup>DTR/DTR</sup>* and *Cd11b<sup>WT/WT</sup>* (wild-type FVB/N) mice were housed and bred under specific pathogen-free conditions at the University of Adelaide Medical School Animal House on a 12 hour (h) light/12 h dark cycle. Eight- to twelve-week-old *Cd11b<sup>DTR/DTR</sup>* and *Cd11b<sup>WT/WT</sup>* females were mated with

BALB/c males and examined the following morning for the presence of a vaginal plug, which indicated 0.5 days *post coitum* (dpc). C57BL/6, FVB/N, and C57BL/6-Tg(CAG-EGFP)131Osb/LeySop mice were purchased from The Jackson Laboratory (Bar Harbor, ME, USA). Mice were bred in the animal care facility at the C.S. Mott Center for Human Growth and Development (Wayne State University, Detroit, MI, USA) and housed on a 12 h light/12 h dark cycle. Eight- to twelve-week-old C57BL/6 or FVB/N females were mated with males of proven fertility and examined daily between 8:00 and 9:00 a.m. for the presence of a vaginal plug. After observation of a vaginal plug, female mice were removed from the mating cages and housed separately. A weight gain  $\geq 2$  grams at 12.5 dpc confirmed pregnancy.

### Experimental treatments in pregnant mice and perinatal outcome variables

*Cd11b<sup>DTR/DTR</sup>* dams were administered 25 ng/g of diphtheria toxin (DT) (in 200  $\mu$ L PBS, i.p.) from *Corynebacterium diphtheriae* (Sigma, St. Louis, MO, USA) on either 16.0 dpc (15.5 dpc at 5-6 pm) or 17.0 dpc (16.5 dpc at 5-6 pm) to deplete CD11b<sup>+</sup> cells. Control *Cd11b<sup>DTR/DTR</sup>* dams were administered 200  $\mu$ L PBS and *Cd11b<sup>WT/WT</sup>* females were administered 25 ng/g of DT in 200  $\mu$ L PBS. A group of *Cd11b<sup>DTR/DTR</sup>* and *Cd11b<sup>WT/WT</sup>* dams was also administered progesterone (Sigma) (200 ng/100  $\mu$ L sesame oil) or sesame oil vehicle control (Sigma) on 16.0 dpc, 17.0 dpc, and 18.0 dpc. The endotoxin content of DT was confirmed to be  $<0.25$  EU/ml (25-50 pg/ml) by Limulus amebocyte assay (E-Toxate, Sigma Aldrich).

Ultrasound-guided intra-amniotic injection of LPS was performed on 16.5 dpc C57BL/6 mice, as previously described (4-6). Briefly, dam anaesthesia was induced with 2–3% isoflurane (Aerrane, Baxter Healthcare Corporation, Deerfield, IL, USA) and 1–2 L/min of oxygen, then maintained with 1.5–2% isoflurane and 1.5–2 L/min of oxygen. Dams were positioned on a heating pad and abdominal hair removed. Body temperature was monitored by rectal probe (Visual Sonics, Toronto, ON, Canada) and maintained at  $37 \pm 1^\circ\text{C}$ , and respiratory and heart rates were monitored by electrodes embedded in the heating pad. Using an ultrasound probe fixed and mobilized with a mechanical holder, ultrasound guided intra-amniotic injection of LPS (*Escherichia coli* O111: B4, Sigma)(100 ng in 25  $\mu$ L of sterile PBS, or 25  $\mu$ L of PBS alone for controls) was performed in each amniotic sac using a 30G needle (Becton Dickinson) stabilized by a mechanical holder (VisualSonics). Following treatments, dams were either monitored by infrared camera (Sony, Tokyo, Japan) until delivery or euthanized for tissue recovery at specific time points in late gestation, as detailed below.

Preterm birth was defined as delivery within 48 h of intervention (CD11b<sup>+</sup> myeloid cell depletion or LPS administration):  $\leq 18.0$  dpc (Figure 2B & Supplementary Figure 9C) or  $<18.5$  dpc (Figure 4B, Figure 6C), and the rate was calculated as proportion of total number of pregnant mice. Gestational length was calculated as the length of time from the presence of the vaginal plug until the appearance of the first pup in the cage bedding. Neonatal survival (% pups born) was calculated at birth, at 12-24 h after birth, and at 8 and 21 days of age. Pup weights were recorded at 12-24 h after birth, as well as 8 and 21 days of age.

### Isolation, differentiation, and adoptive transfer of bone marrow-derived macrophages

For reconstitution experiments in *Cd11b<sup>DTR/DTR</sup>* mice, bone marrow was collected from *Cd11b<sup>WT/WT</sup>* mice and treated with red blood cell lysis buffer. Cells were resuspended in complete RPMI medium (cRPMI, 10% FBS, 100 U/mL penicillin, 100 mg/mL streptomycin, 1% L-glutamate) supplemented with 20% L929 conditioned media as a source of CSF-1 and seeded at  $1 \times 10^6$  cells/ml, as described (7). Macrophages were collected on day 6 for adoptive transfer experiments after repeated washing with ice-cold PBS using StemPro Accutase Cell Dissociation Reagent (Life Technologies). Approximately  $5\text{--}10 \times 10^6$  cells were resuspended in 250  $\mu$ L RPMI for intravenous (i.v.) injection into each dam on both 14.5 and 16.5 dpc, prior to i.p. administration of DT, or PBS on 16.5 dpc. This number was the maximum number of cells that could feasibly be transferred by tail vein injection, and was judged sufficient to partially repopulate a *CD11b<sup>DTR/DTR</sup>* mouse after DT administration, based on

estimates of  $\sim 3 \times 10^5$  CD11b<sup>+</sup>F4/80<sup>+</sup> cells/ ml in peripheral blood, and  $\sim 1 \times 10^6$  CD11b<sup>+</sup>F4/80<sup>+</sup> cells/ g of uterus (Fig. 2B).

For experiments in C57BL/6 mice, bone marrow-derived cells from C57BL/6 donors were treated with red blood cell lysis buffer and cultured in IMDM medium (Thermo Scientific) supplemented with 10% FBS (Invitrogen, Carlsbad, CA, USA) and 10 ng/mL of recombinant CSF1 (Cat#576402; BioLegend, San Diego, CA, USA), and incubated at 37°C with 5% CO<sub>2</sub> for 7 days. On day 7, the culture medium was replaced with fresh IMDM medium + 10% FBS and 10 ng/mL each of recombinant IL-4 (Cat#574302, BioLegend) and IL-13 (Cat#575902, BioLegend), or fresh IMDM medium + 10% FBS and 10 ng/mL CSF1. On day 8 of culture, 14-18 hours later, macrophages were collected for adoptive transfer. Either M2-polarized BMDM or non-polarized BMDM ( $2 - 3 \times 10^6$ ) were re-suspended in 100  $\mu$ L sterile PBS for i.v. injection on 15.5 or 16.5 dpc, prior to the intra-amniotic administration of lipopolysaccharide (LPS), or PBS. Flow cytometry was performed to quantify expression of phenotype markers Egr-2 and Ym1/2 in both BMDM preparations (Supplementary Table 3). Some mice were administered GFP<sup>+</sup> M2-polarized BMDM to allow tracking of passively transferred macrophages recruited into gestational tissues. BMDM were recovered from C57BL/6-Tg(CAG-EGFP)131Osb/LeySop mice, cultured and administered to recipients, as described above. Leukocytes were isolated from myometrial, decidual, and placental tissues as previously described, and flow cytometry was performed to determine the numbers of GFP<sup>+</sup>F4/80<sup>+</sup> cells in each tissue as detailed below.

### Immunohistochemistry

Whole uterus (myometrium and endometrium) and placenta were collected from *Cd11b<sup>DTR/DTR</sup>* dams 24 h after administration of DT or PBS on 16.0 dpc. Tissue sections (5  $\mu$ m thick) were cut and mounted on glass microscope slides. The sections were blocked with 15% normal mouse serum (NMS) and 15% normal rabbit serum for 30 min at 37°C followed by overnight incubation with rat anti-mouse F4/80 in PBS (1:100 dilution), 1.5% NMS, and 1.5% normal rabbit serum (eBioscience, San Diego, CA, USA) at 4°C in a humidified chamber. Afterwards, the tissues were incubated with biotinylated rabbit anti-rat IgG (1:200 dilution) for 40 min at room temperature (Vector Laboratories, Burlingame, CA, USA), followed by a 30 min incubation with Elite ABC reagent from the VECTASTAIN ABC Elite kit (Vector Laboratories). Horseradish peroxidase was localized with diaminobenzidine tetrachloride (DAB) (DAKO, Glostrup, Denmark), and tissues were counterstained with hematoxylin (Sigma). Negative control sections were incubated either with irrelevant primary antibody, the secondary antibody alone, or no antibody. There was no positive staining identified in the control slides. Within the labyrinth zone of the placenta, F4/80<sup>+</sup> cells in the intervillous space containing maternal blood, identified by their characteristic structure and the presence of red blood cells, were considered macrophages of maternal origin. F4/80<sup>+</sup> cells within the interstitial compartment, exhibiting structural features typical of villous tissue with a syncytiotrophoblast lining, were considered macrophages of fetal origin (Hofbauer cells) (8, 9).

### Isolation of murine leukocytes for immunophenotyping

Maternal and fetal tissues were collected from *Cd11b<sup>DTR/DTR</sup>* dams 24 h after administration of DT or PBS on 16.0 dpc, and *Cd11b<sup>WT/WT</sup>* dams 24 h after administration of 25 ng/g of DT on 16.0 dpc, and leukocytes were isolated as previously described (10). Dams were weighed and anesthetized with avertin [tribromoethanol dissolved in amylene hydrate and distilled water] (Sigma). Peripheral blood was recovered by cardiac puncture and placed in tubes containing heparin sodium (Sigma). Mice were then euthanized by cervical dislocation, and the uterine myometrium, uterine decidua, placenta, and fetal liver were collected, rinsed in PBS, pooled (3-4 tissues, respectively), and gently dissociated in StemPro Accutase Cell Dissociation Reagent (Life Technologies) using scissors. After incubation at 37°C for 40 min, cells were filtered using a 100  $\mu$ m cell strainer (Becton Dickinson, Franklin Lakes, NJ, USA) and washed with FACS buffer (0.1% bovine serum albumin and 0.05%

sodium azide in PBS). Cell debris was removed by centrifugation in 1 mL of fetal calf serum, followed by washing with 500  $\mu$ L of FACS buffer.

### Immunophenotyping of murine leukocytes

Immediately after isolation, leukocyte cell pellets from the blood, myometrium, decidua, placenta, and fetal liver were re-suspended in FACS buffer and pre-incubated with Fc Block (Becton Dickinson, clone 2.4G2) for 10 min on ice and subsequently incubated with specific fluorochrome-conjugated anti-mouse antibodies shown in Supplementary Table 3. Red blood cells were lysed using RBC lysis buffer (150 mM ammonium chloride, 10 mM potassium bicarbonate and 0.1 mM EDTA, pH 7.2). The lineage and phenotype of viable leukocytes [4',6-diamidino-2-phenylindole (DAPI)<sup>+</sup>CD45<sup>+</sup> cells] were analyzed using combinations of antibodies against CD45, CD11b, F4/80, CD11c, MHC class II, Ly6G, CD3, CD4, CD8, CD49b, and CD69 according to gating strategies shown in Supplementary Figures 6A, 7 and 8A. Total numbers of leukocyte subsets were determined using CountBright Absolute Counting Beads (Molecular Probes, Invitrogen, Eugene, OR, USA). The term 'cells/ml' refers to the number of cells per ml of FACS buffer, at the time of flow cytometry analysis, and is directly proportional to the number of cells/uterus. The number of cells per ml was calculated using the formula provided by CountBright<sup>TM</sup> Absolute Counting Beads (Molecular Probes). This formula considers the number of cells, number of beads, and volume in which cells were resuspended. For tissues, cells were obtained after dissociation of ~30-50 mg of tissue resuspended in 1 ml of FACS buffer. For blood, 100  $\mu$ L of blood was utilized in all experiments and white blood cells were resuspended in 1 mL of FACS buffer. The analysis and preparation of images were performed using FlowJo Software Version 10.

### Gene expression analysis in murine decidual tissue

Uterine decidual tissue was collected from *Cd11b<sup>DTR/DTR</sup>* dams 24 h after administration of DT or PBS on 16.0 dpc. Total RNA was extracted from each sample with Trizol, following the manufacturer's instructions. RNA concentration and purity were assessed with the NanoDrop 1000 spectrophotometer (Thermo Scientific, Wilmington, DE, USA) and RNA integrity was evaluated using agarose gels. Complementary (c) DNA was synthesized using the RT<sup>2</sup> First Strand Kit (QIAGEN, Hilden, Germany). A single pooled sample was generated for each group (n = 7-8 dams/pool). The RT<sup>2</sup> Profiler Mouse Innate & Adaptive Immune Response PCR Array (Cat#PAMM-052ZA-2, QIAGEN) and RT<sup>2</sup> Profiler Mouse Inflammatory Response & Autoimmunity PCR Array (Cat#PAMM-077ZA-2, QIAGEN) were used for mRNA expression profiling and performed using RT<sup>2</sup> SYBR Green ROX qPCR MasterMix (QIAGEN) on a 7500 Fast Real-Time PCR System (Applied Biosystems, Life Technologies, Foster City, CA, USA) (Supplementary Table 4).

Interaction network analysis of down-regulated and up-regulated genes with protein–protein interactions was performed using STRING (Search Tool for the Retrieval of Interacting Genes) v.10.0 software (11).

### Measurement of plasma progesterone

For measurement of plasma progesterone, peripheral blood was collected by cardiac puncture from *Cd11b<sup>DTR/DTR</sup>* dams 24 h after administration of DT or PBS on 16.0 dpc. Plasma was obtained after centrifugation at 1300 x g for 10 min at 4°C and progesterone concentrations were measured using an enzyme-linked immunoassay (Mouse/Rat Progesterone Kit, Cat#55-PROMS-E01, ALPCO Diagnostics, Salem, NH, USA), following the manufacturer's instructions.

### Cytokine secretion by myometrial and decidual macrophages

Myometrial and decidual tissue was collected from *Cd11b<sup>WT/WT</sup>* mice on 16.5 dpc, 17.5 dpc and 18.5 dpc, and disaggregated as described above. Single cell suspensions were then incubated with biotin-conjugated rat anti-mouse F4/80 (clone BM8, eBioscience) and streptavidin microbeads (Miltenyi Biotec) for positive selection

using MS columns and a magnetic MACS separator. The purity of isolated macrophages were confirmed to be >90% by flow cytometry to detect F4/80<sup>+</sup> cells. Cells were counted using an automatic cell counter (Cellometer Auto 2000; Nexcelom, Lawrence, MA, USA) and plated in a 24-well plate (Fisher Scientific, Waltham, MA, USA) at a density of  $1 \times 10^6$  cells/mL in complete RPMI medium for culture at 37°C with 5% CO<sub>2</sub>. Macrophages were collected 6 h later and the supernatant recovered for analysis of IL-10, IL-12p70, TNF, and TGFβ concentrations using Quantikine ELISA Kits (R&D Systems, Minneapolis, MN, USA).

### **Cytokine and chemokine concentrations in the maternal circulation and amniotic fluid**

C57BL/6 dams were administered LPS or PBS by intra-amniotic injection on 16.5 dpc, with or without adoptive transfer of M2-polarized BMDM, as described above, then 16 h later were anesthetized with avertin (Sigma) for recovery of maternal peripheral blood by cardiac puncture. After euthanasia by cervical dislocation, amniotic fluid was collected from each amniotic sac with a 26G needle. Maternal plasma and amniotic fluid were stored at -20°C until analysis. The ProcartaPlex Mouse Cytokine & Chemokine Panel 1A 36-plex (Invitrogen by Thermo Fisher Scientific, Vienna, Austria) was used to quantify IFNα, IFNγ, IL-12p70, IL-1β, IL-2, TNF, GM-CSF, IL-18, IL-17A, IL-22, IL-23, IL-27, IL-9, IL-15/IL-15R, IL-13, IL-4, IL-5, IL-6, IL-10, Eotaxin (CCL11), IL-28, IL-3, LIF, IL-1α, IL-31, GRO-α (CXCL1), MIP1α (CCL3), IP10 (CXCL10), MCP-1 (CCL2), MCP-3 (CCL7), MIP-1β (CCL4), MIP-2 (CXCL2), RANTES (CCL5), G-CSF, M-CSF, and ENA-78 (CXCL5) according to the manufacturer's instructions. Plates were read using the Luminex 100 SystemFill (Luminex, Austin, TX, USA), and analyte concentrations were calculated with ProcartaPlex Analyst 1.0 Software (Affymetrix, San Diego, CA, USA). The sensitivities of the assays were: 3.03 pg/mL (IFNα), 0.09 pg/ml (IFNγ), 0.21 pg/mL (IL-12p70), 0.14 pg/mL (IL-1β), 0.10 pg/mL (IL-2), 0.39 pg/mL (TNF), 0.19 pg/mL (GM-CSF), 9.95 pg/mL (IL-18), 0.08 pg/mL (IL-17A), 0.24 pg/mL (IL-22), 2.21 pg/mL (IL-23), 0.34 pg/mL (IL-27), 0.28 pg/mL (IL-9), 0.42 pg/mL (IL-15/IL-15R), 0.16 pg/mL (IL-13), 0.03 pg/mL (IL-4), 0.32 pg/mL (IL-5), 0.21 pg/mL (IL-6), 0.69 pg/mL (IL-10), 0.01 pg/mL (Eotaxin), 20.31 pg/mL (IL-28), 0.11pg/mL (IL-3), 0.28 pg/mL (LIF), 0.32 pg/mL (IL-1α), 0.45 pg/mL (IL-31), 0.05 pg/mL (GRO-α), 0.13 pg/mL (MIP-1α), 0.26 pg/mL (IP-10), 3.43 pg/mL (MCP-1), 0.15 pg/mL (MCP-3), 1.16 pg/mL (MIP-1β), 0.37 pg/mL (MIP-2), 0.35 pg/mL (RANTES), 0.19 pg/mL (G-CSF), 0.02 pg/mL (M-CSF), and 5.67 pg/mL (ENA-78). Inter-assay and intra-assay coefficients of variation were less than 10%.

### **Gene expression in the fetal brain and lung upon treatment with M2-polarized macrophages**

C57BL/6 dams were administered LPS or PBS by intra-amniotic injection on 16.5 dpc, with or without adoptive transfer of M2-polarized macrophages, as described above, then 16 h later were euthanized to collect the fetal brain and lung. The tissues were stored in RNAlater Stabilization Solution (Invitrogen by Thermo Fisher Scientific, Baltics UAB, Lithuania) until RNA isolation. Total RNA was isolated using QIAshredders, RNase-Free DNase Sets, and RNeasy Mini Kits (QIAGEN), according to the manufacturer's instructions. RNA concentrations and purity were assessed with the NanoDrop 1000 spectrophotometer (Thermo Scientific), and RNA integrity was evaluated with the Bioanalyzer 2100 (Agilent Technologies, Wilmington, DE, USA). Complementary (c)DNA was synthesized using SuperScript III First-Strand Synthesis SuperMix (Invitrogen by Thermo Fisher Scientific, Carlsbad, CA, USA). Gene expression profiling was performed on the BioMark™ System for high-throughput RT-qPCR (Fluidigm, San Francisco, CA, USA) with the TaqMan® gene expression assays (Applied Biosystems, Life Technologies Corporation, Foster City, CA, USA) listed in Supplementary Table 5.

## REFERENCES

1. Xu Y, Plazyo O, Romero R, Hassan SS, and Gomez-Lopez N. Isolation of leukocytes from the human maternal-fetal interface. *J Vis Exp*. 2015(99):e52863.
2. Cailhier JF, Partolina M, Vuthoori S, Wu S, Ko K, Watson S, et al. Conditional macrophage ablation demonstrates that resident macrophages initiate acute peritoneal inflammation. *J Immunol*. 2005;174(4):2336-42.
3. Duffield JS, Forbes SJ, Constandinou CM, Clay S, Partolina M, Vuthoori S, et al. Selective depletion of macrophages reveals distinct, opposing roles during liver injury and repair. *J Clin Invest*. 2005;115(1):56-65.
4. Gomez-Lopez N, Romero R, Arenas-Hernandez M, Panaitescu B, Garcia-Flores V, Mial TN, et al. Intra-amniotic administration of lipopolysaccharide induces spontaneous preterm labor and birth in the absence of a body temperature change. *J Maternal-Fetal & Neonatal Med*. 2018;31(4):439-46.
5. Garcia-Flores V, Romero R, Miller D, Xu Y, Done B, Veerapaneni C, et al. Inflammation-induced adverse pregnancy and neonatal outcomes can be improved by the immunomodulatory peptide exendin-4. *Frontiers Immunol*. 2018;9:1291.
6. Faro J, Romero R, Schwenkel G, Garcia-Flores V, Arenas-Hernandez M, Leng Y, et al. Intra-amniotic inflammation induces preterm birth by activating the NLRP3 inflammasome. *Biol Reprod*. 2019;100(5):1290-305.
7. Care AS, Diener KR, Jasper MJ, Brown HM, Ingman WV, and Robertson SA. Macrophages regulate corpus luteum development during embryo implantation in mice. *J Clin Invest*. 2013;123(8):3472-87.
8. Takahashi K, Naito M, Katabuchi H, and Higashi K. Development, differentiation, and maturation of macrophages in the chorionic villi of mouse placenta with special reference to the origin of Hofbauer cells. *J Leukoc Biol*. 1991;50(1):57-68.
9. Adamson SL, Lu Y, Whiteley KJ, Holmyard D, Hemberger M, Pfarrer C, et al. Interactions between trophoblast cells and the maternal and fetal circulation in the mouse placenta. *Dev Biol*. 2002;250(2):358-73.
10. Arenas-Hernandez M, Sanchez-Rodriguez EN, Mial TN, Robertson SA, and Gomez-Lopez N. Isolation of leukocytes from the murine tissues at the maternal-fetal interface. *J Vis Exp*. 2015(99):e52866.
11. Szklarczyk D, Franceschini A, Wyder S, Forslund K, Heller D, Huerta-Cepas J, et al. STRING v10: protein-protein interaction networks, integrated over the tree of life. *Nucleic Acids Res*. 2015;43:D447-52.

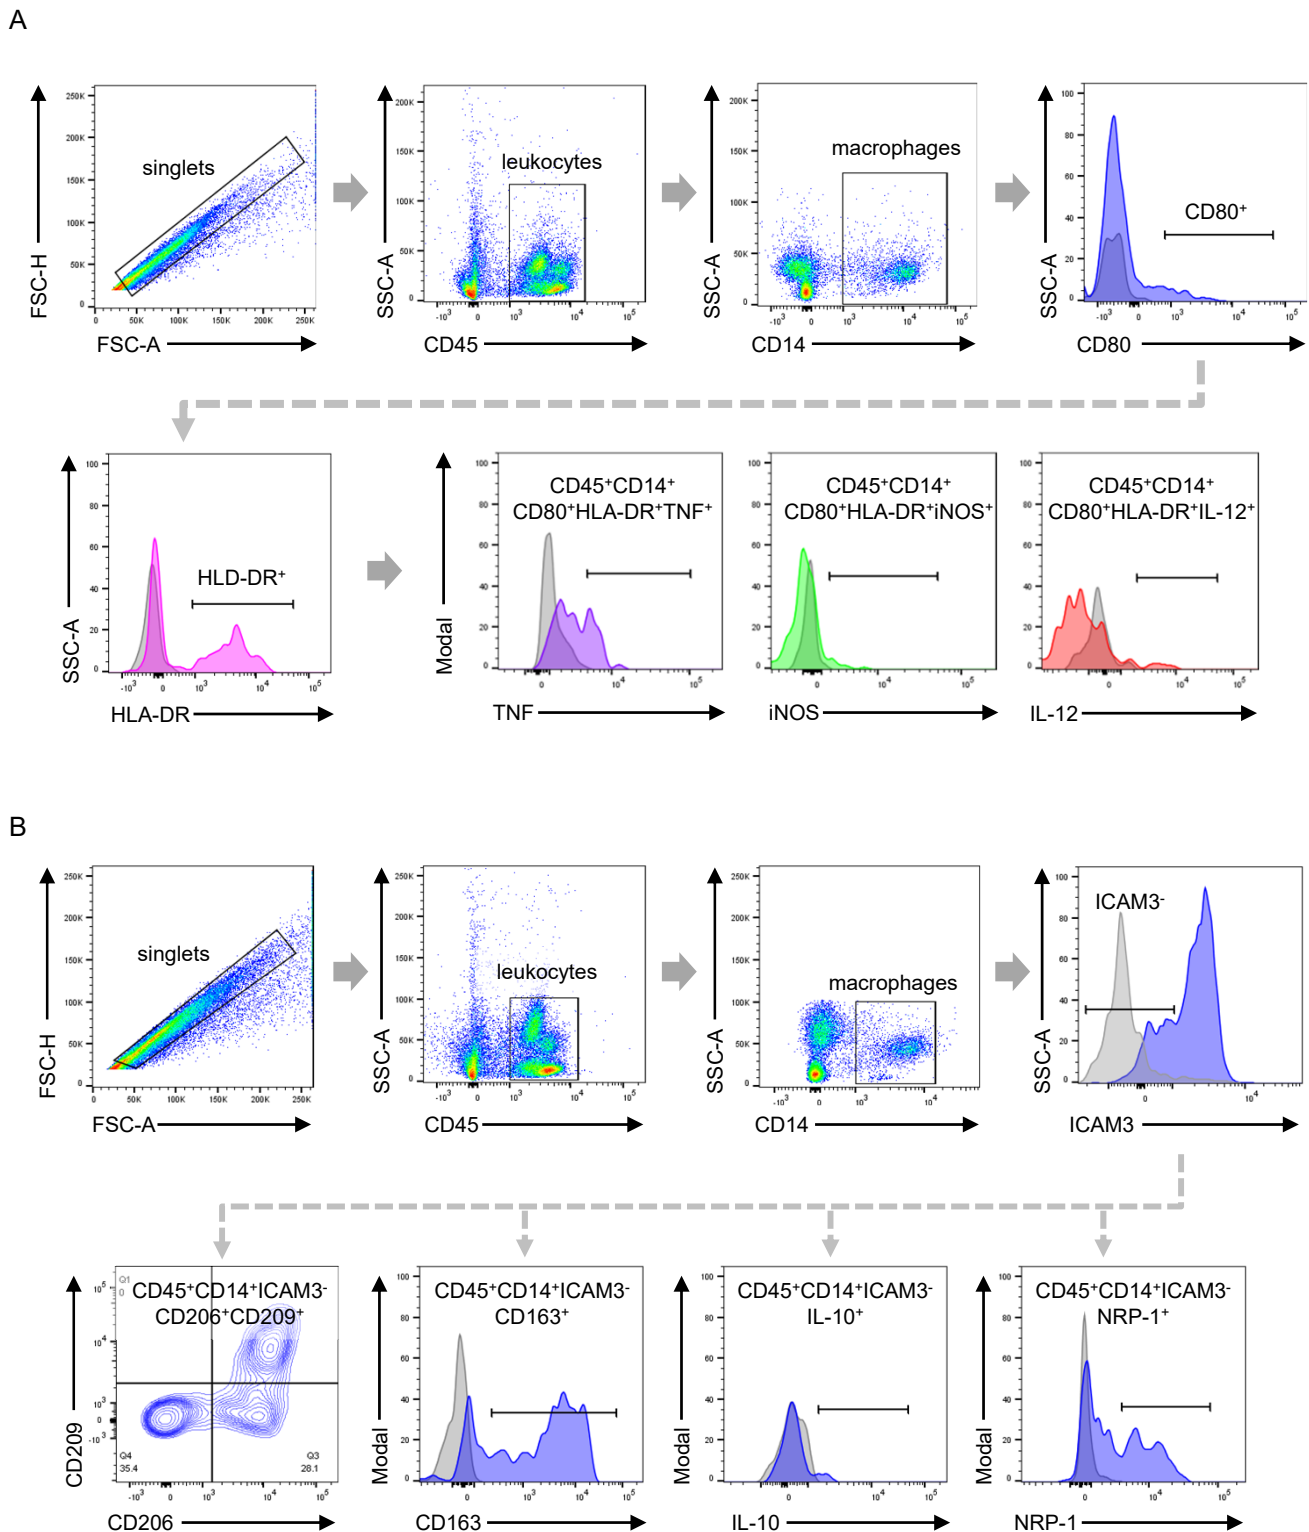

**Supplementary Figure 1, related to Figure 1. Gating strategy to identify macrophage subsets at the maternal-fetal interface of women with term or spontaneous preterm birth. (A)** Gating strategy used to identify  $CD45^+CD14^+CD80^+HLA-DR^+$  cells, considered pro-inflammatory macrophages, and subsets expressing TNF, iNOS, or IL12, in uterine decidual tissues. **(B)** Gating strategy used to identify  $CD45^+CD14^+ICAM3^-$  cells, considered homeostatic macrophages, and subsets expressing CD206 and CD209, CD163, IL-10, or NRP-1, in uterine decidual tissues.

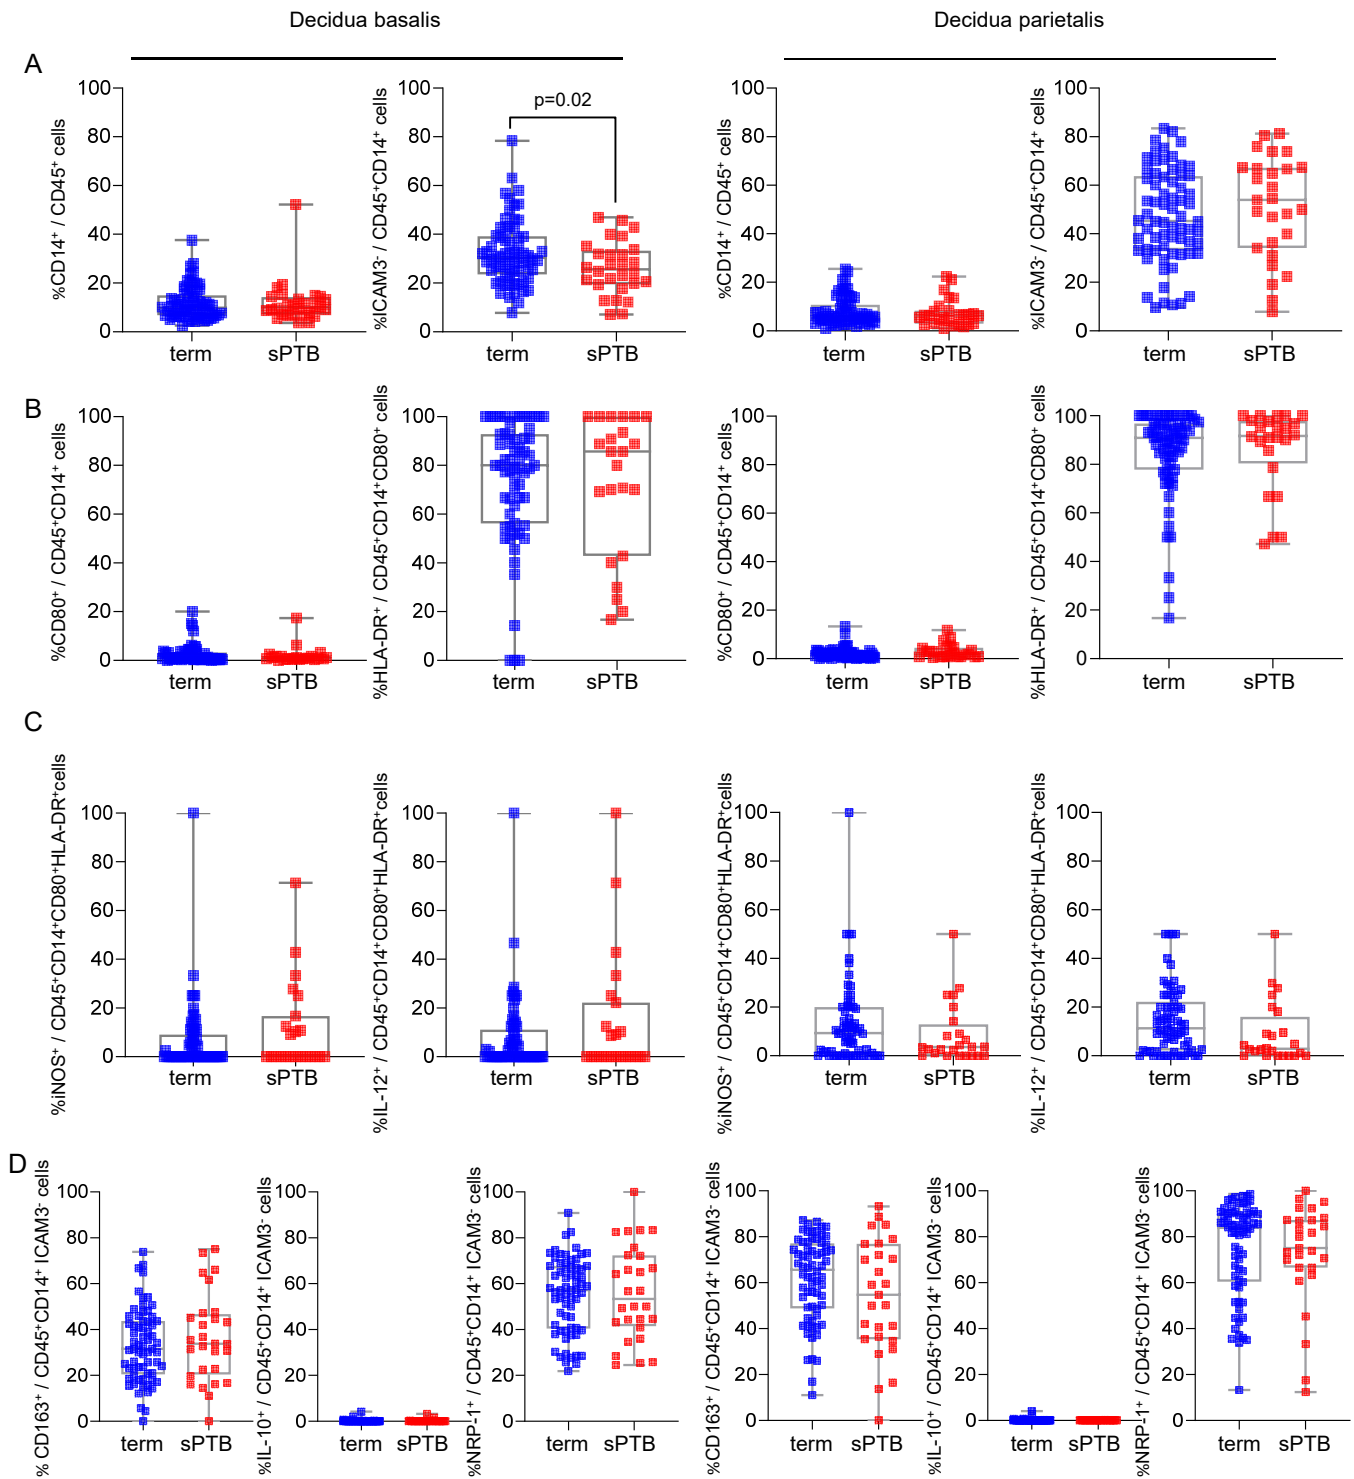

**Supplementary Figure 2, related to Figure 1. Macrophage subsets that were not differentially abundant at the maternal-fetal interface of women with spontaneous preterm birth (sPTB), compared to term birth.** Frequency of macrophages and macrophage subsets in the decidua basalis and the decidua parietalis of women who underwent term birth (n = 63-68) or spontaneous preterm birth (n = 23-28). The frequency of (A) CD14<sup>+</sup> / CD45<sup>+</sup> cells and ICAM3<sup>+</sup> / CD45<sup>+</sup>CD14<sup>+</sup> cells; (B) CD80<sup>+</sup> / CD45<sup>+</sup>CD14<sup>+</sup> cells and HLA-DR<sup>+</sup> / CD45<sup>+</sup>CD14<sup>+</sup>CD80<sup>+</sup> cells; (C) iNOS<sup>+</sup> / CD45<sup>+</sup>CD14<sup>+</sup>HLA-DR<sup>+</sup>CD80<sup>+</sup> and IL-12<sup>+</sup> / CD45<sup>+</sup>CD14<sup>+</sup>HLA-DR<sup>+</sup>CD80<sup>+</sup> cells, and (D) CD163<sup>+</sup> / CD45<sup>+</sup>CD14<sup>+</sup>ICAM3<sup>+</sup>, IL-10<sup>+</sup> / CD45<sup>+</sup>CD14<sup>+</sup> ICAM3<sup>+</sup> and NRP-1<sup>+</sup> / CD45<sup>+</sup>CD14<sup>+</sup> ICAM3<sup>+</sup> cells. Data are shown as boxplots where midlines indicate medians, boxes indicate interquartile range, and whiskers indicate minimum/maximum range. Symbols are values from individual women. Data were analyzed by Mann-Whitney U-test. P values were considered significant when *P* < 0.05. Demographic and clinical characteristics of the study population are shown in Table 1.

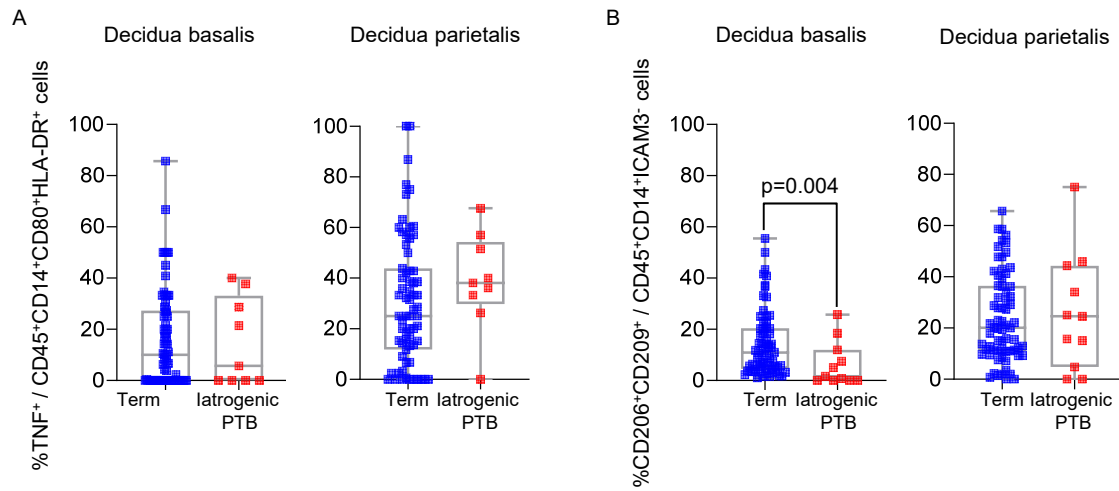

**Supplementary Figure 3, related to Figure 1. Macrophage subsets at the maternal-fetal interface of women with iatrogenic preterm birth (PTB), compared to term birth. (A)** Frequency of TNF<sup>+</sup> / CD45<sup>+</sup>CD14<sup>+</sup>CD80<sup>+</sup>HLA-DR<sup>+</sup> cells in the decidua basalis and the decidua parietalis of women who underwent term (n = 63-66) and iatrogenic preterm birth (n = 9-11). **(B)** Frequency of %CD206<sup>+</sup>CD209<sup>+</sup> / CD45<sup>+</sup>CD14<sup>+</sup>ICAM3<sup>+</sup> cells in the decidua basalis and the decidua parietalis of women who underwent term (n = 67-68) or iatrogenic preterm birth (n = 9-11). Data are shown as boxplots where midlines indicate medians, boxes indicate interquartile range, and whiskers indicate minimum/maximum range. Symbols are values from individual women. Data were analyzed by Mann-Whitney U-tests. *P* values were considered significant when *P* < 0.05.

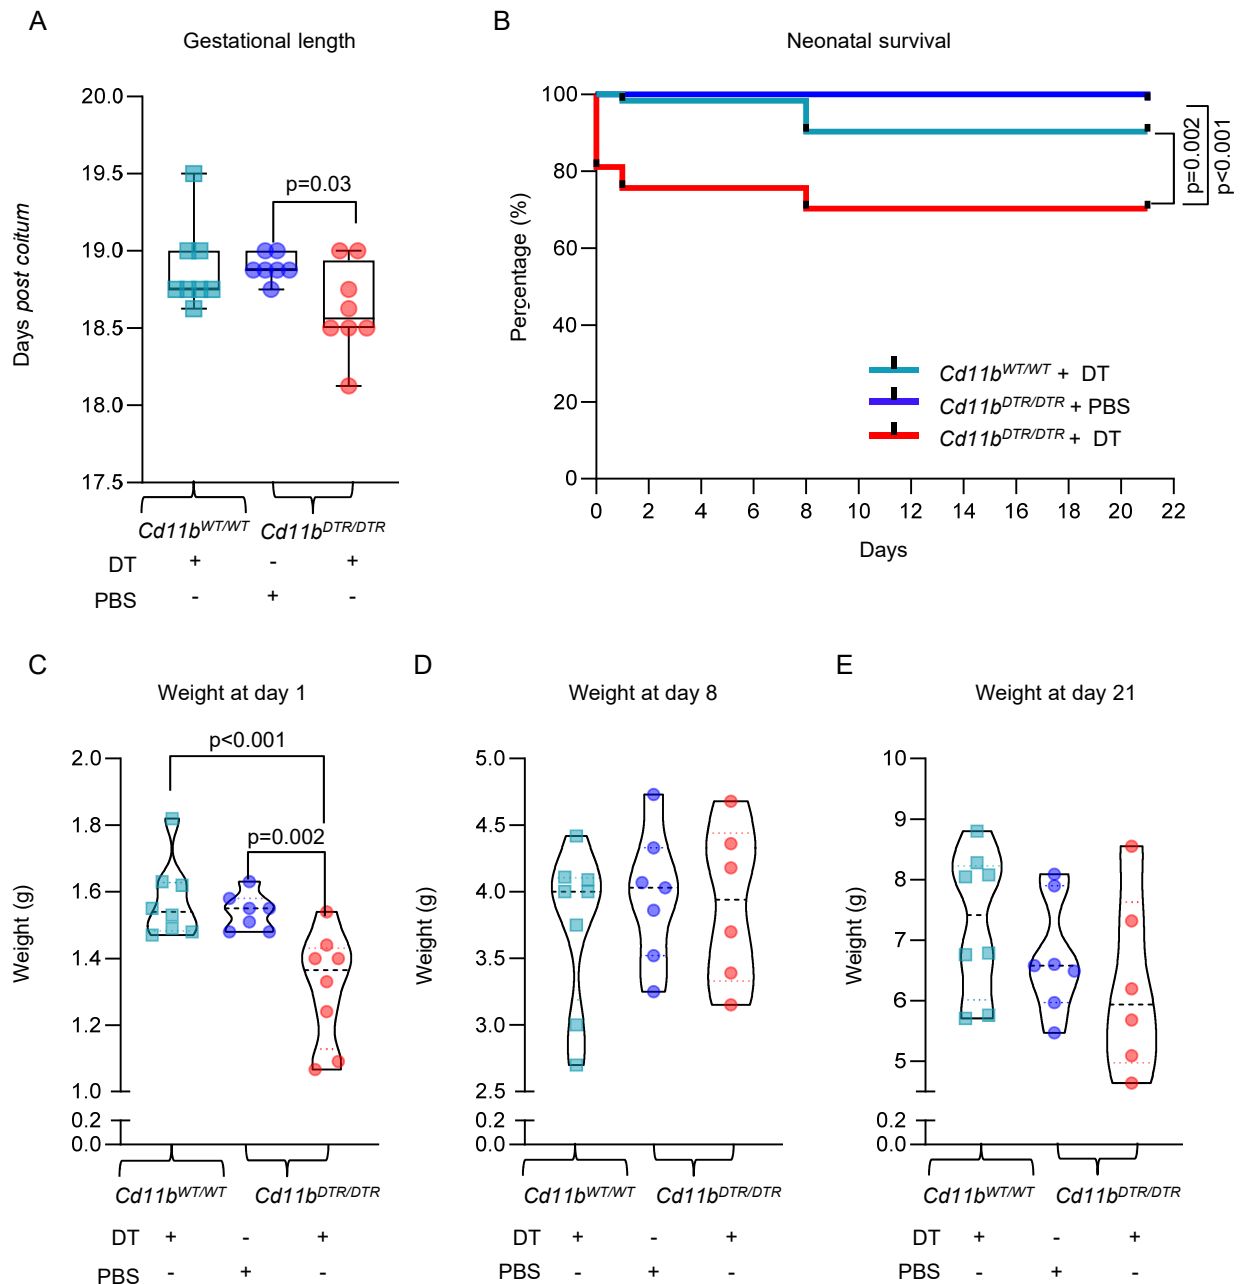

**Supplementary Figure 4, related to Figure 2. Depletion of  $Cd11b^+$  myeloid cells on 17.0 days post coitum.**  $Cd11b^{DTR/DTR}$  or  $Cd11b^{WT/WT}$  dams were administered diphtheria toxin (DT, 25 ng/g, i.p.) or PBS on 16.0 days post coitum (dpc). There was no effect of treatment on rate of preterm birth (delivery within 48 h of intervention, eg.  $\leq 19.0$  dpc). Parameters shown are **(A)** gestational length presented as boxplots where midlines indicate medians, boxes indicate interquartile range, and whiskers indicate minimum/maximum range medians with interquartile and minimum/maximum ranges, analyzed by Kruskal-Wallis test followed by Mann-Whitney U-test, and **(B)** Kaplan-Meier survival curves showing the percentage survival per litter of neonates at 1, 8, and 21 days postpartum, analyzed by Mantel-Cox tests. **(C, D, E)** Violin plots showing the mean weight per litter of surviving pups at 1, 8, and 21 days postpartum. Symbols are median values from individual dams. Data were analyzed by one-way ANOVA followed by post-hoc t-test.  $P$  values were considered significant when  $P < 0.05$ .

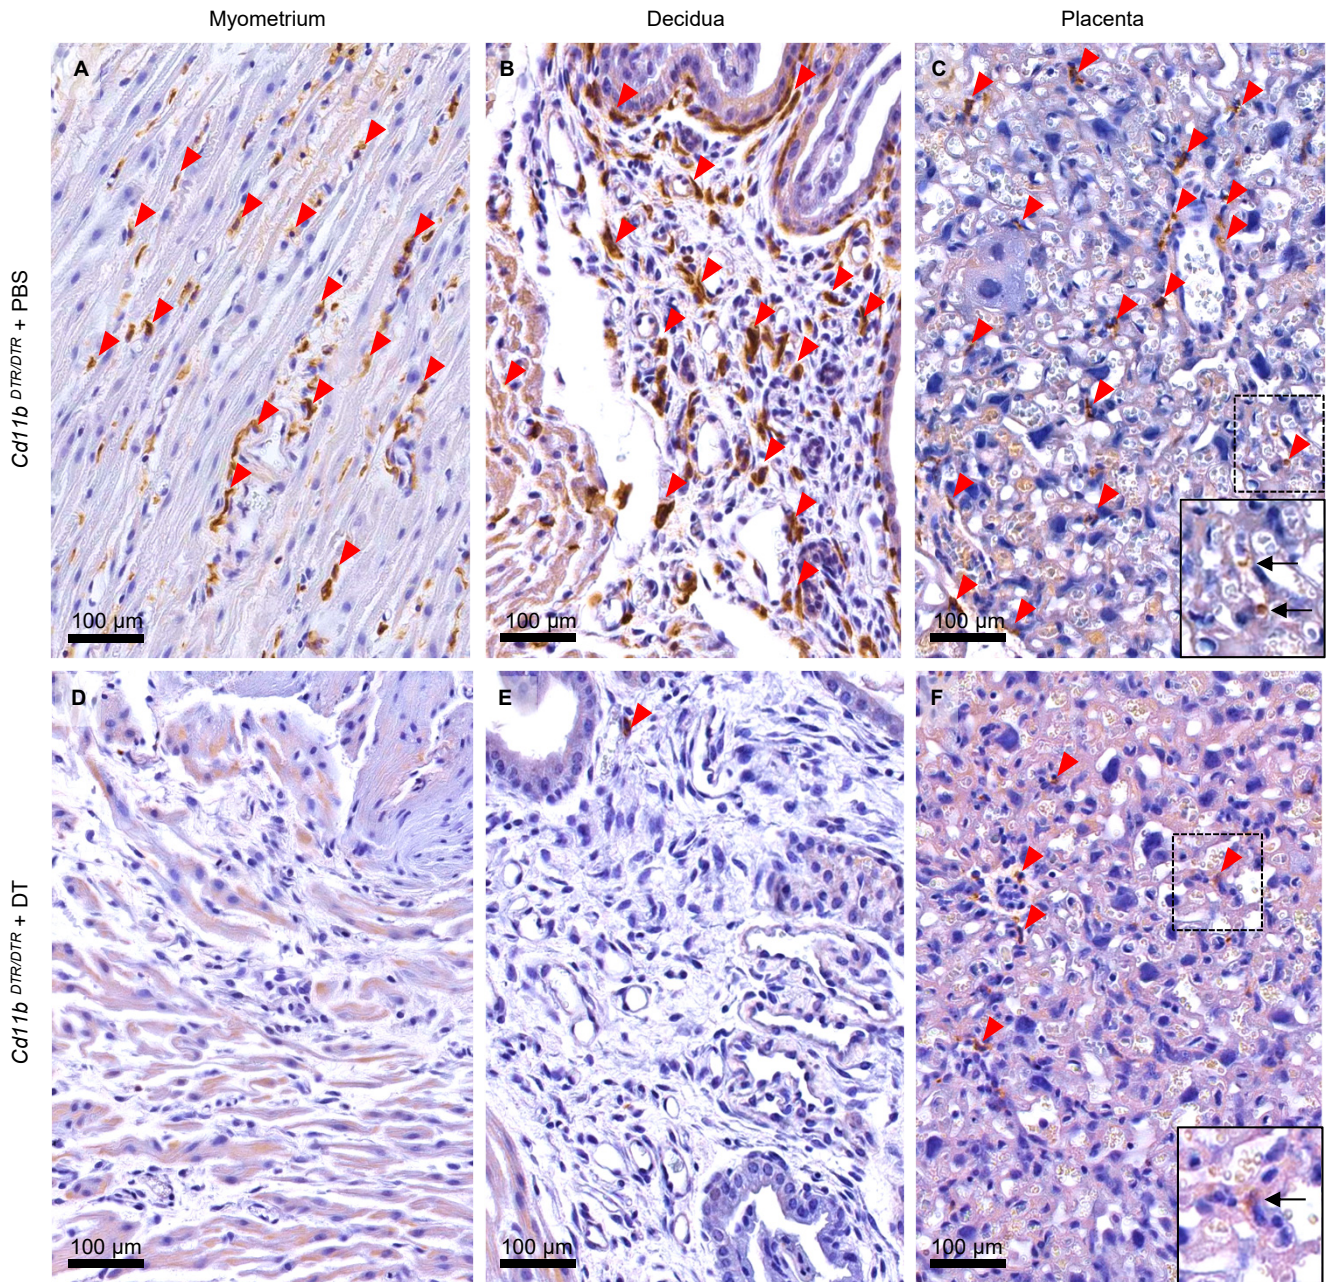

**Supplementary Figure 5, related to Figure 3. Administration of diphtheria toxin to *Cd11b<sup>DTR/DTR</sup>* dams depletes F4/80<sup>+</sup> macrophages from the uterus and reduces F4/80<sup>+</sup> macrophages in the placenta.** *Cd11b<sup>DTR/DTR</sup>* or *Cd11b<sup>WT/WT</sup>* dams were administered diphtheria toxin (DT, 25 ng/g, i.p.) or PBS on 16.0 days *post coitum* (dpc). Twenty-four hours post-injection, sections of intact uterine implantation sites (myometrium and decidua) and placenta were collected to detect F4/80<sup>+</sup> cells by immunohistochemistry. (A, B, C) Myometrium, decidua, and placenta from *Cd11b<sup>DTR/DTR</sup>* dams administered PBS. (D, E, F) Myometrium, endometrium, and placenta from *Cd11b<sup>DTR/DTR</sup>* dams administered DT. Representative photomicrographs are shown, with the marked area shown at a 2-fold higher magnification in boxes in the lower right hand side of panel C and F. In the placental labyrinth, F4/80<sup>+</sup> cells within the intervillous maternal blood space (considered macrophages of maternal origin) can be distinguished from F4/80<sup>+</sup> cells within the interstitial villous tissue (considered macrophages of fetal origin, e.g. Hofbauer cells). Macrophages in placental tissue in panel C are located in both the interstitial (fetal) tissue and the maternal blood space, while the macrophages in placental tissue in panel F appear to be located in the interstitial (fetal) tissue. Red arrowheads indicate F4/80<sup>+</sup> cells. Black arrows indicate F4/80<sup>+</sup> cells within the maternal blood space (panel C) and the fetal interstitial tissue (panel F). Bars are 100 μm.

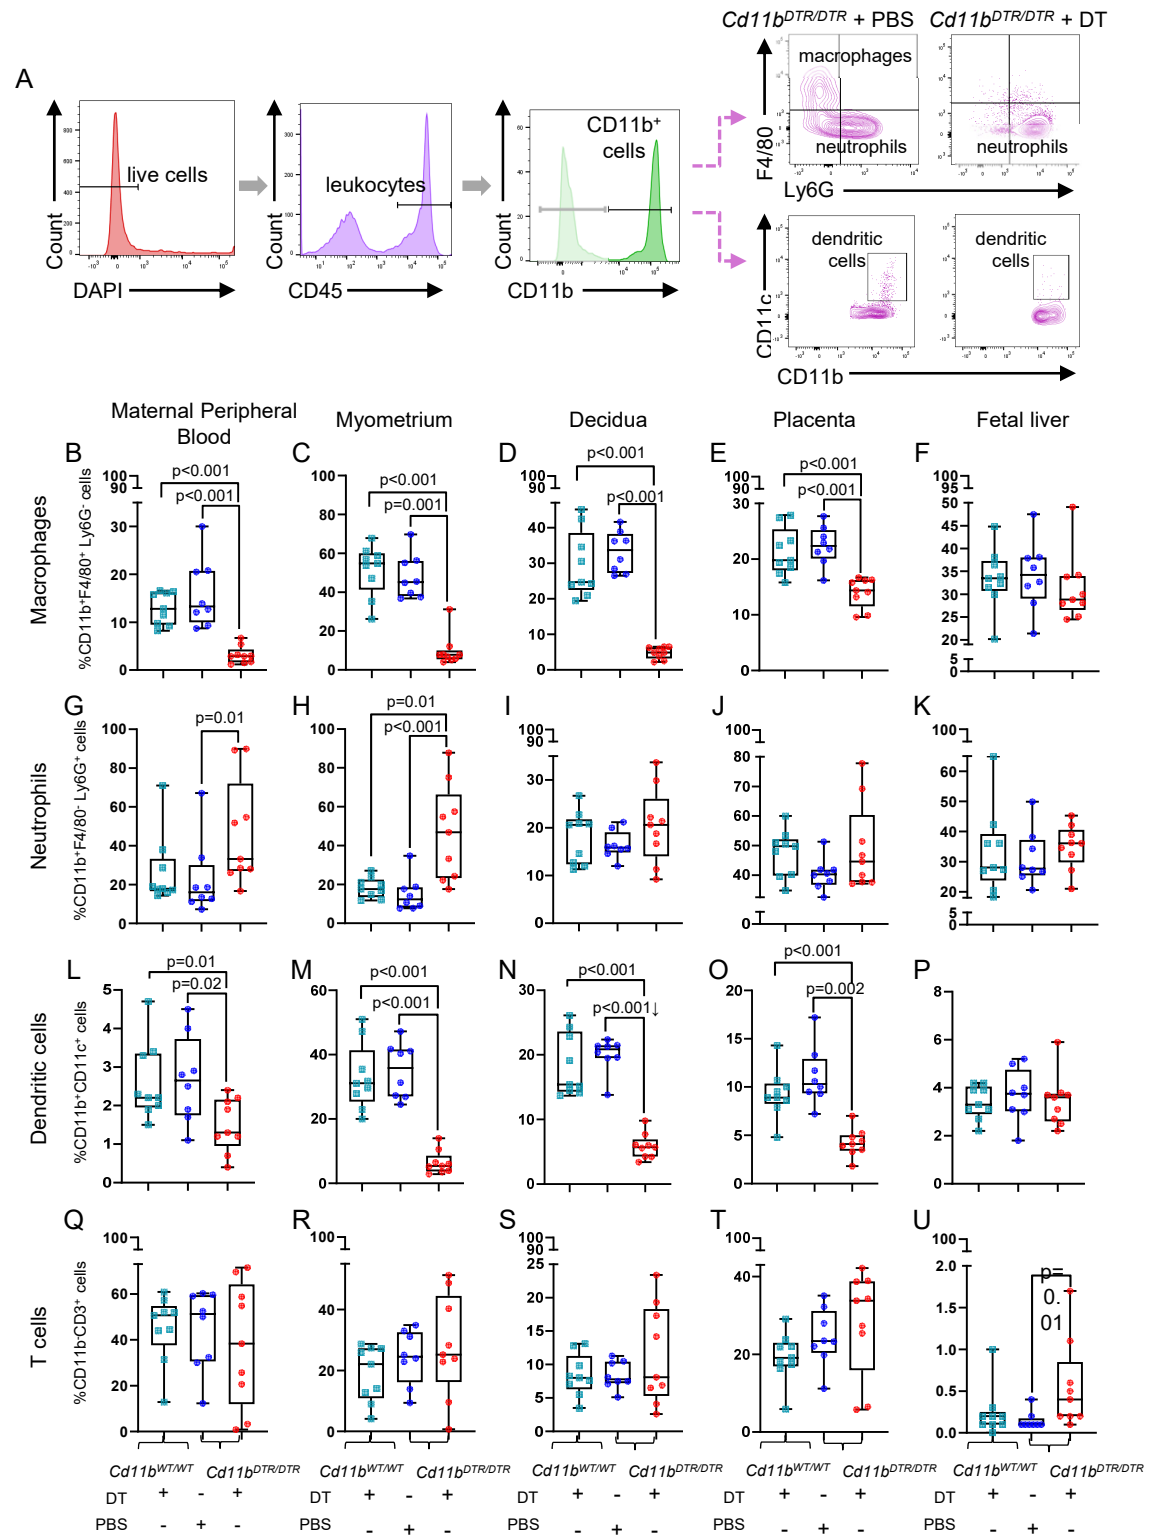

**Supplementary Figure 6, related to Figure 3. Effects of depletion of maternal CD11b<sup>+</sup> myeloid cells on leukocyte populations in maternal and fetal tissues.** *Cd11b<sup>DTR/DTR</sup>* or *Cd11b<sup>WT/WT</sup>* dams were administered diphtheria toxin (DT, 25 ng/g, i.p.) or PBS on 16.0 days *post coitum* (dpc). Tissues were collected 24 h later for analysis of leukocytes by flow cytometry. **(A)** Gating strategy used to identify macrophages (CD45<sup>+</sup>CD11b<sup>+</sup>F4/80<sup>+</sup>Ly6G<sup>-</sup> cells), neutrophils (CD45<sup>+</sup>CD11b<sup>+</sup>F4/80<sup>-</sup>Ly6G<sup>+</sup> cells), and dendritic cells (CD45<sup>+</sup>CD11b<sup>+</sup>CD11c<sup>+</sup> cells). (Gating strategy used to identify T cells is shown in Supplementary Figure 8). Proportions of CD45<sup>+</sup> leukocytes comprised by macrophages (**B-F**), neutrophils (**G-K**), dendritic cells (**L-P**), and T cells (CD45<sup>+</sup>CD11b<sup>+</sup>CD3<sup>+</sup> cells) (**Q-U**), in the maternal peripheral blood, uterine myometrium, uterine decidua, placenta, and fetal liver (*n* = 8-9 per group). Data are percentage of CD45<sup>+</sup> leukocytes, shown as boxplots where midlines indicate medians, boxes indicate interquartile range, and whiskers indicate minimum/maximum range. Symbols are values from individual dams. Data were analyzed by ANOVA followed by post-hoc t-test. *P* values were considered significant when *P* < 0.05.

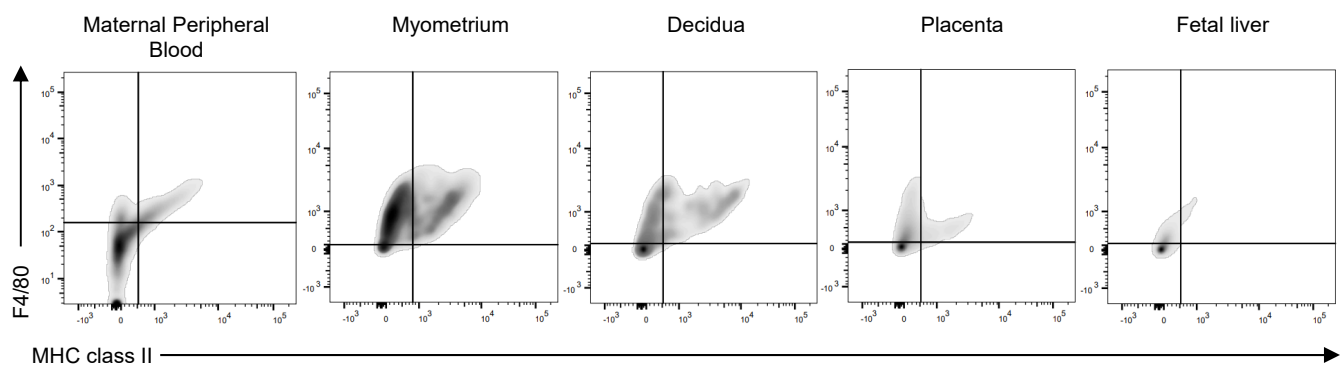

**Supplementary Figure 7, related to Figure 3. Expression of MHC class II by F4/80<sup>+</sup> cells in the maternal peripheral blood, uterine myometrium, uterine decidua, placenta, and fetal liver.** Tissues were collected from *CD11b<sup>WT/WT</sup>* dams on 17.0 days post coitum for analysis of macrophages by flow cytometry using markers F4/80 and MHC class II (see Materials and Methods). Representative density plots are shown.

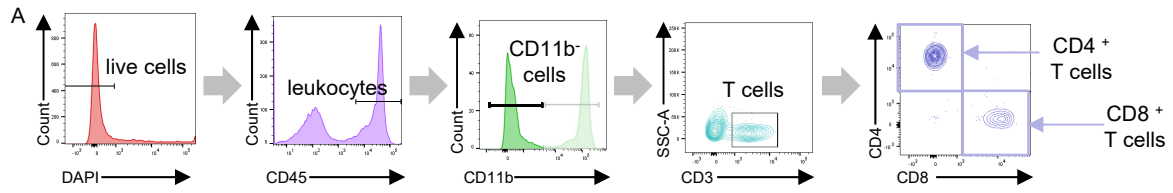

T cell subsets (as relative number)

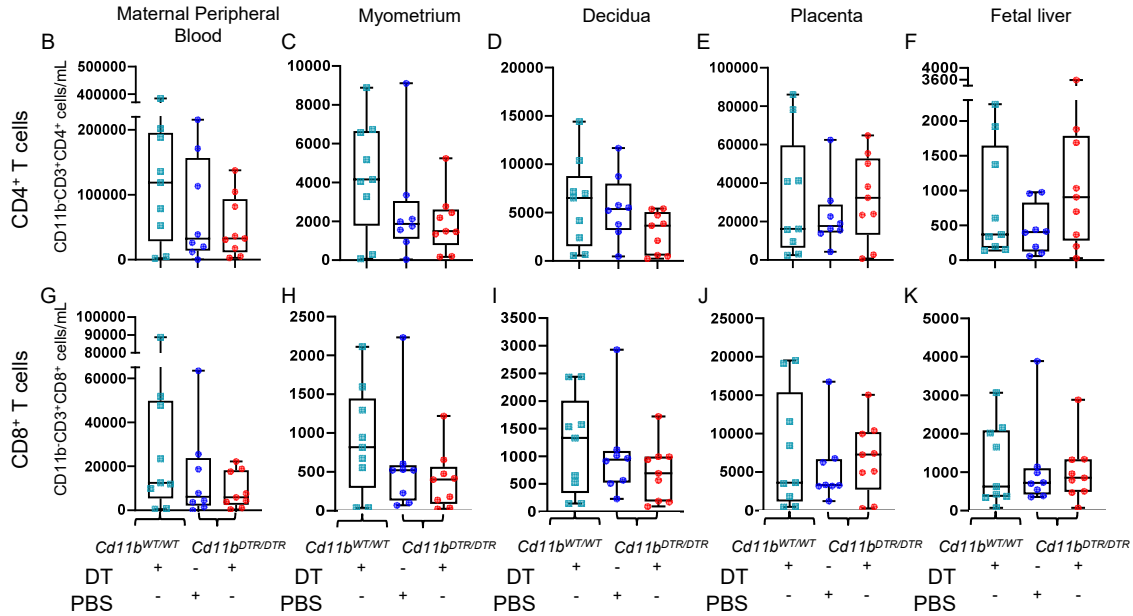

T cell subsets (as proportion of total T cells)

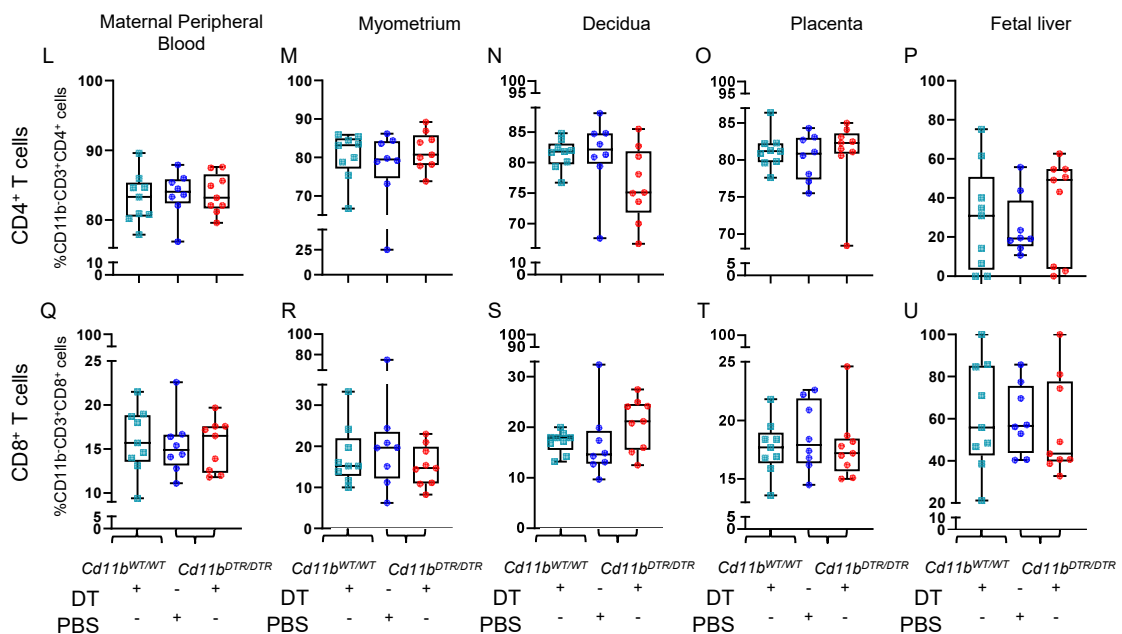

**Supplementary Figure 8, related to Figure 3. Effects of depletion of maternal CD11b<sup>+</sup> myeloid cells on CD4<sup>+</sup> and CD8<sup>+</sup> T cell populations in maternal and fetal tissues. (A)** Gating strategy used to identify CD4<sup>+</sup> T cells (CD45<sup>+</sup>CD11b<sup>+</sup>CD3<sup>+</sup>CD4<sup>+</sup> cells), and CD8<sup>+</sup> T cells (CD45<sup>+</sup>CD11b<sup>+</sup>CD3<sup>+</sup>CD8<sup>+</sup> cells). *Cd11b*<sup>DTR/DTR</sup> or *Cd11b*<sup>WT/WT</sup> dams were administered diphtheria toxin (DT, 25 ng/g, i.p.) or PBS on 16.0 days *post coitum* (dpc). Tissues were collected 24 h later for analysis of T cells by flow cytometry. Numbers of CD4<sup>+</sup> T cells (**B-F**) and CD8<sup>+</sup> T cells (**G-K**) in the maternal peripheral blood, uterine myometrium, uterine decidua, placenta, and fetal liver (n = 8-9 per group). Proportions of CD4<sup>+</sup> T cells (**L-P**), and CD8<sup>+</sup> T cells (**Q-U**) in the maternal circulation, myometrium, decidua, placenta, and fetal liver from macrophage-depleted *Cd11b*<sup>DTR/DTR</sup> or control dams (n = 8-9 per group). Data in B-K are number of cells/ ml of digested tissue single cell suspension (see Materials and Methods), and data in L-U are percentage of CD3<sup>+</sup> T cells presented as boxplots where midlines indicate medians, boxes indicate interquartile range, and whiskers indicate minimum/maximum range. Symbols are values from individual dams. Data were analyzed by ANOVA followed by post-hoc t-test. *P* values were considered significant when *P* < 0.05.

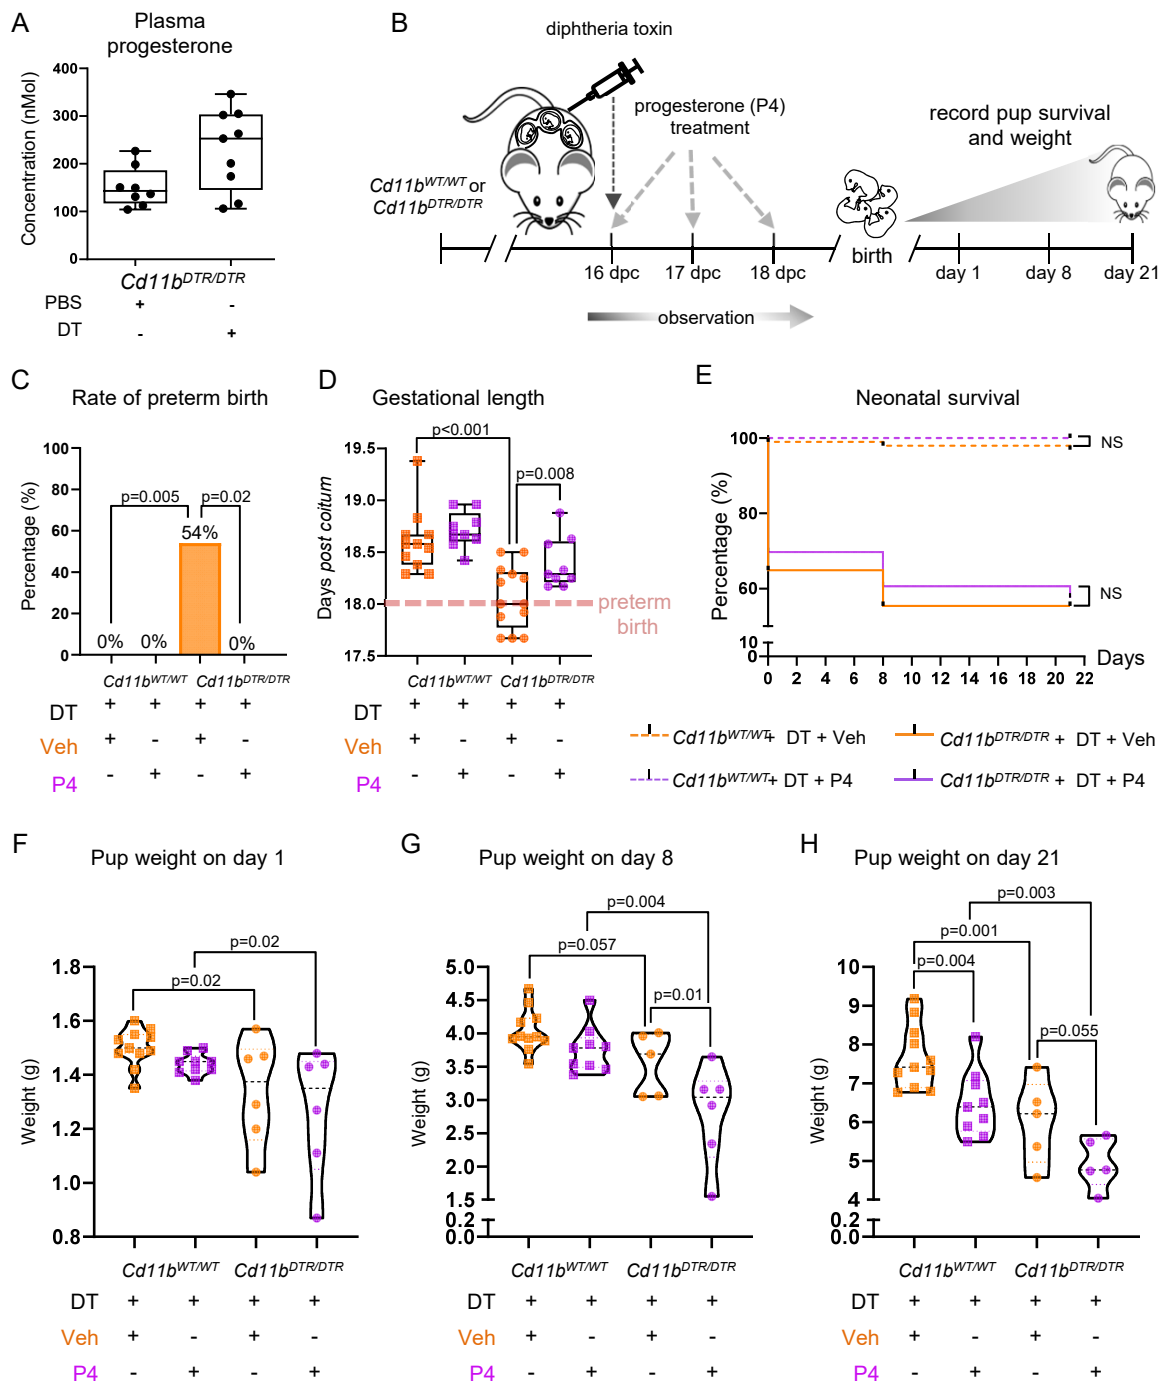

**Supplementary Figure 9. Progesterone administration prevents preterm birth but does not reverse adverse neonatal outcomes after depletion of CD11b<sup>+</sup> myeloid cells in *Cd11b<sup>DTR/DTR</sup>* dams.** (A) Maternal plasma progesterone concentration in *Cd11b<sup>DTR/DTR</sup>* dams (mean and SEM, n = 8-9 per group) 24 h after injection of diphtheria toxin (DT, 25 ng/g, i.p.) or PBS on 16.0 dpc. Systemic progesterone concentrations are shown as boxplots where midlines indicate medians, boxes indicate interquartile range, and whiskers indicate minimum/maximum range. Data were analyzed by Mann-Whitney U-test. (B) *Cd11b<sup>DTR/DTR</sup>* or *Cd11b<sup>WT/WT</sup>* dams were administered diphtheria toxin (DT, 25 ng/g, i.p.) or PBS on 16.0 days post coitum (dpc), then administered either progesterone (P4, 200 ng in 100  $\mu$ l sesame oil, s.c.) or sesame oil (vehicle control; Veh) on 16.0 dpc, 17.0 dpc, and 18.0 dpc. Timing of birth and neonatal outcomes were recorded (all n = 9-13 dams per group). Parameters shown are (C) rate of preterm birth (delivery within 48 h of intervention, eg.  $\leq 18.0$  dpc), analyzed by Fisher's exact test; (D) gestational length presented as boxplots where midlines indicate medians, boxes indicate interquartile range, and whiskers indicate minimum/maximum range medians with interquartile and minimum/maximum ranges, analyzed by Kruskal-Wallis test followed by Mann-Whitney U-test. (E) Kaplan-Meier survival curves showing the percentage survival per litter of neonates at 1, 8, and 21 days postpartum, analyzed by Mantel-Cox tests. (F, G, H) Violin plots showing the mean weight per litter of surviving pups at 1, 8, and 21 days postpartum. Symbols are median values from individual dams. Data were analyzed by one-way ANOVA followed by post-hoc t-test. P values were considered significant when  $P < 0.05$ .

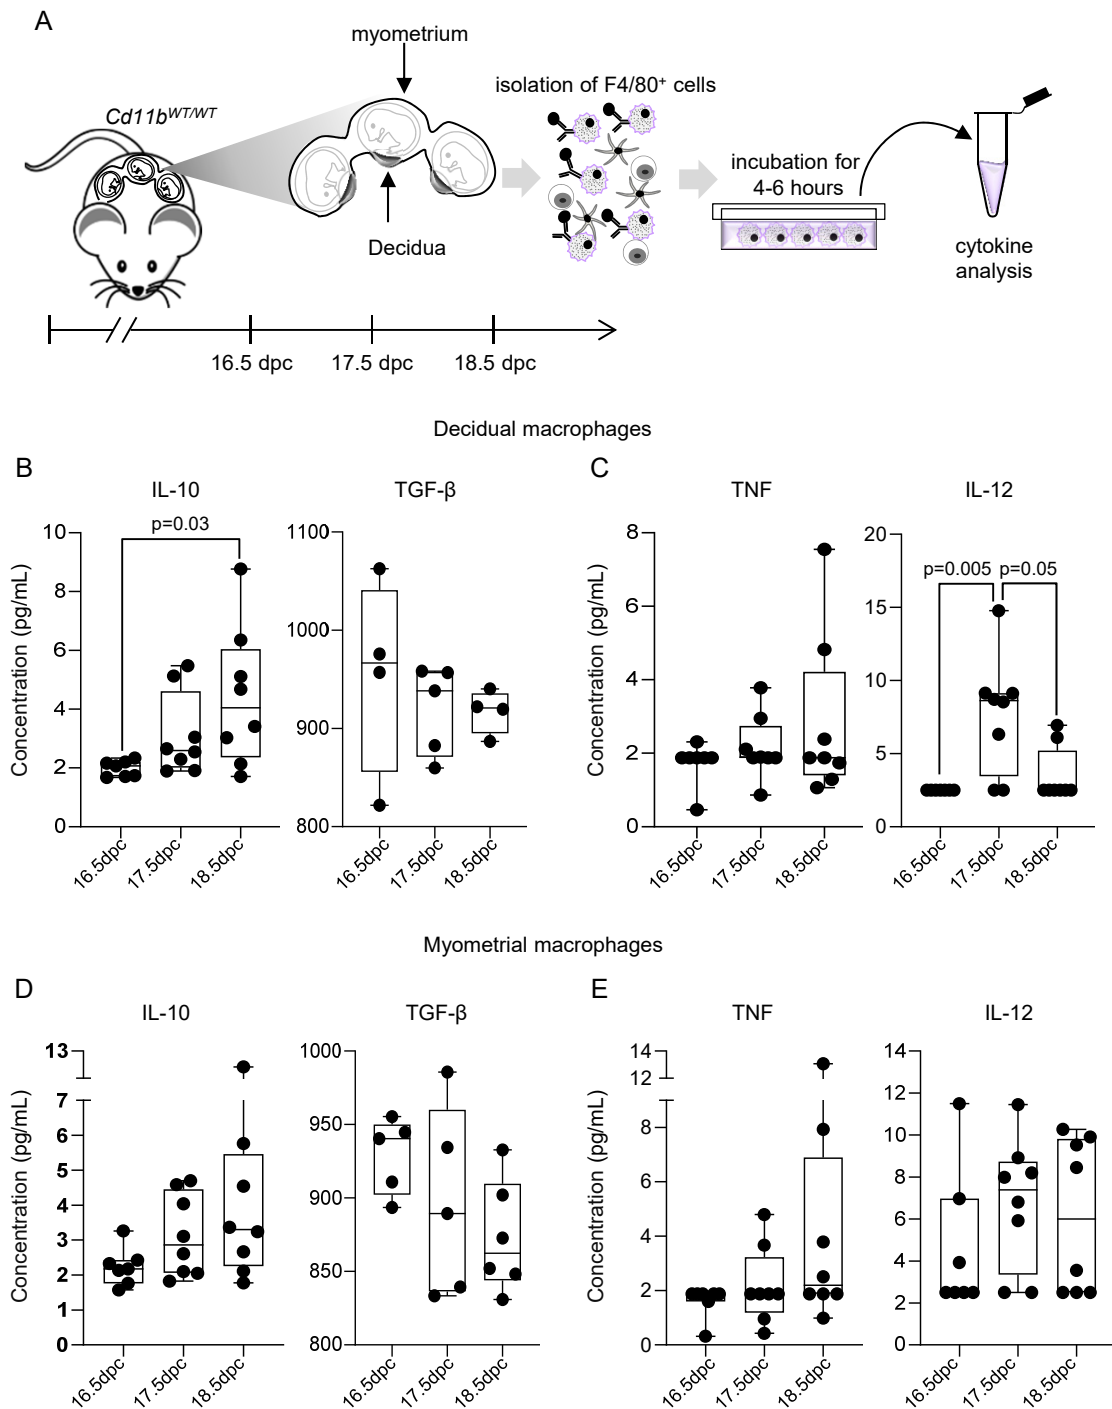

**Supplementary Figure 10. Changing dynamics of cytokine synthesis by macrophages in the uterine decidua and myometrium during late gestation in wild-type mice.** (A) The myometrium and decidua were collected from *Cd11b*<sup>WT/WT</sup> dams on 16.5 dpc, 17.5 dpc, or 18.5 dpc. Macrophages were isolated and cultured for 4-6 h, and cytokine concentrations were evaluated in the culture media. (B, C) Concentrations of IL-10, TGF- $\beta$ , TNF, and IL-12 in culture media from decidual macrophages collected on day 16.5 dpc, 17.5 dpc, or 18.5 dpc (n = 7-8 per group). (D, E) Concentrations of IL-10, TGF- $\beta$ , TNF, and IL-12 in culture media from myometrial macrophages collected on day 16.5 dpc, 17.5 dpc, or 18.5 dpc (n = 7-8 per group). Data are presented as boxplots where midlines indicate medians, boxes indicate interquartile range, and whiskers indicate minimum/maximum range. Symbols are median values from individual dams. Data were analyzed by Kruskal-Wallis test followed by Mann-Whitney U-test. *P* values were considered significant when *P* < 0.05.

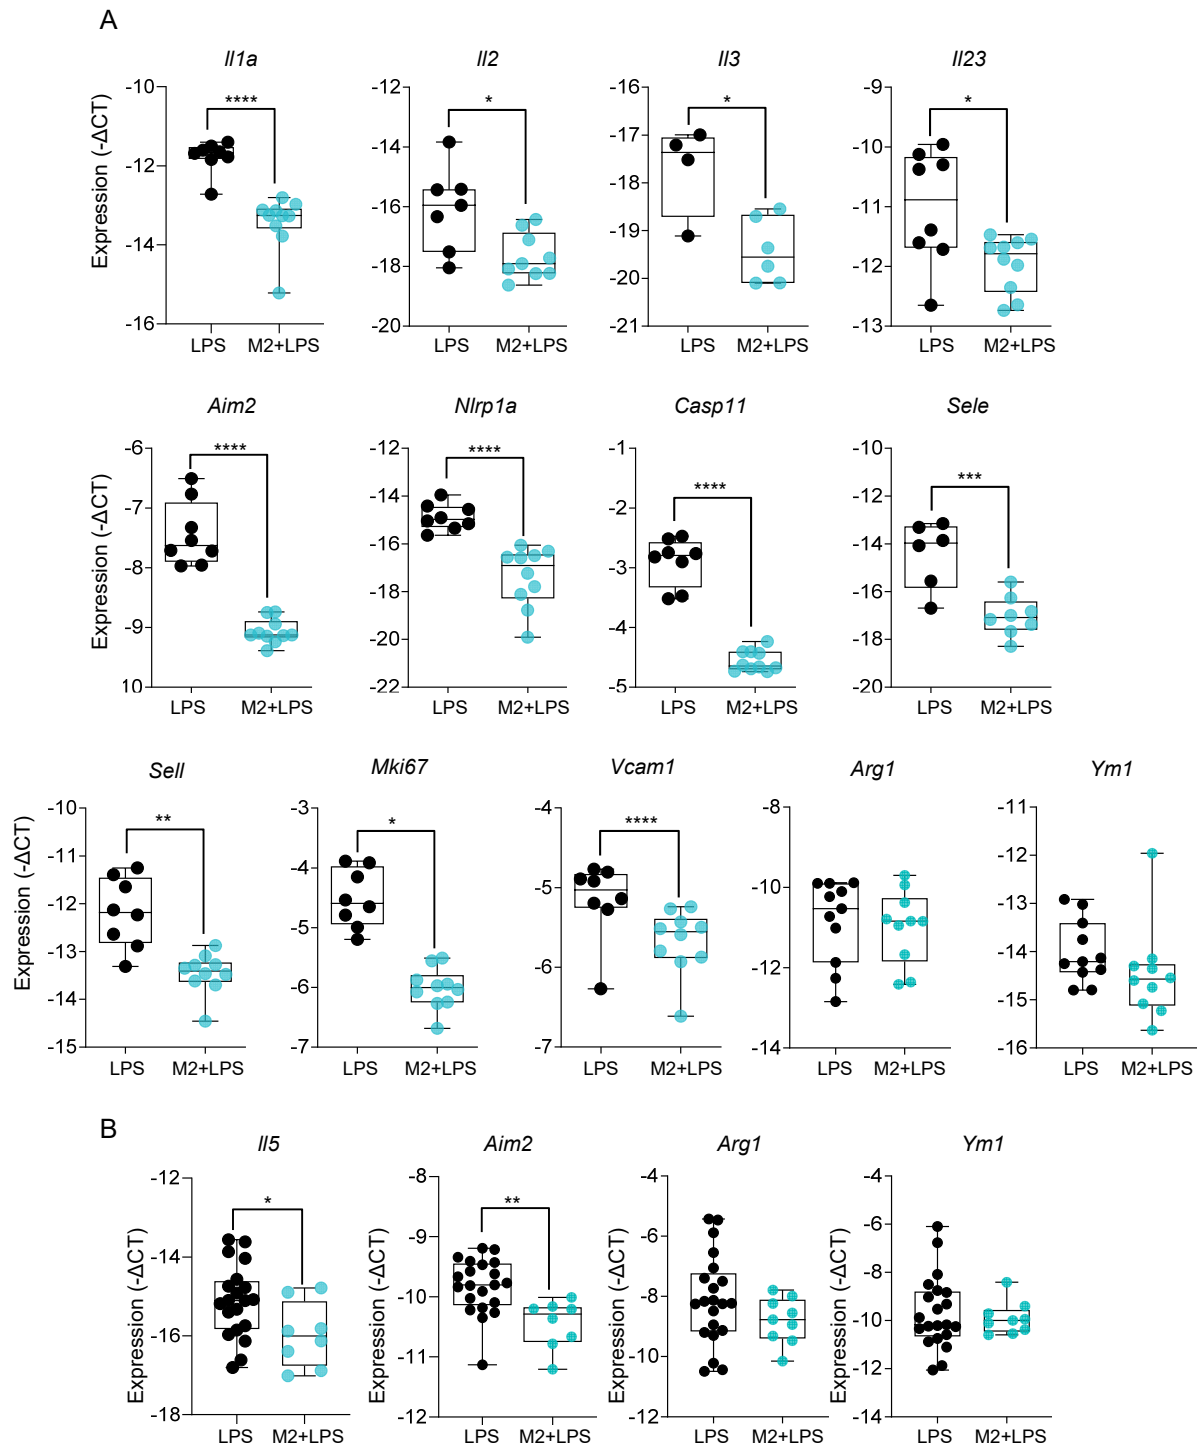

**Supplementary Figure 11, related to Figure 8. Effect of adoptive transfer of M2 polarized macrophages to dams on inflammatory gene expression in the brain and lung of fetuses after intra-amniotic administration of LPS.** M2-polarized macrophages (M2 Mφ), or vehicle, were administered intravenously on 15.5 days *post coitum* (dpc) and 16.5 dpc to C57BL/6 dams, followed by intra-amniotic injection with lipopolysaccharide (LPS) on 16.5 dpc (M2+LPS). Control C57BL/6 dams were injected intra-amniotically with LPS only (LPS). Dams were euthanized 16 h after LPS injection to collect fetal brain and lung for evaluation of gene expression. **(A)** Expression of *Il1a*, *Il2*, *Il3*, *Il23*, *Aim2*, *Nlrp1a*, *Casp11*, *Sele*, *Sell*, *Mki67*, *Vcam1*, *Arg1*, and *Ym1* in the fetal brain (n = 4-10 per group). **(B)** Expression of *Il5*, *Aim2*, *Arg1*, and *Ym1* in the fetal lung (n = 8-21 per group). Data are shown as boxplots where midlines indicate medians, boxes indicate interquartile range, and whiskers indicate minimum/maximum range. Symbols are values from individual fetuses. Data were analyzed by Mann-Whitney U-tests. P values were considered significant when  $P < 0.05$ . \*  $P < 0.05$ , \*\*  $P < 0.01$ , \*\*\*  $P < 0.001$ , \*\*\*\*  $P < 0.0001$ .

**Supplementary Table 1.** Demographic and clinical characteristics of women with iatrogenic preterm birth.

|                                                    | Iatrogenic Preterm Birth<br>(n=11) |
|----------------------------------------------------|------------------------------------|
| Maternal age [years; median (IQR)]                 | 26 (23.5-35.5)                     |
| Body mass index [kg/m <sup>2</sup> ; median (IQR)] | 28.1 (22.2-35.3)                   |
| Gestational age at delivery [weeks; median (IQR)]  | 33.7 (31.7-36.2)                   |
| Birth weight [grams; median (IQR)]                 | 1805 (1501-2220)                   |
| Race/ethnicity                                     |                                    |
| African-American                                   | 81.8% (9/11)                       |
| White                                              | 18.2% (2/11)                       |
| Other                                              | 0% (0/11)                          |
| Primiparity                                        | 18.2% (2/11)                       |
| Cesarean section                                   | 72.7% (8/11)                       |
| Indication for Iatrogenic Preterm Birth            |                                    |
| Hypertensive Disorders of Pregnancy                | 90.9% (10/11)                      |
| Preeclampsia                                       | 72.7% (8/11)                       |
| Chronic Hypertension                               | 9.1 % (1/11)                       |
| Eclampsia                                          | 9.1 % (1/11)                       |
| Placental Abruption                                | 9.1 % (1/11)                       |

<sup>a</sup> One missing datum; IQR, interquartile range

**Supplementary Table 2.** Antibodies used for human cell analysis.

| Antigen | Fluorophore     | Clone       | Company        | Isotype               |
|---------|-----------------|-------------|----------------|-----------------------|
| CD45    | V450            | HI30        | BD Biosciences | Mouse IgG1, $\kappa$  |
| CD14    | APC-Cy7         | M $\phi$ P9 | BD Biosciences | Mouse IgG2b, $\kappa$ |
| CD80    | PE-Cy7          | L307.4      | BD Biosciences | Mouse C3H             |
| HLA-DR  | PE-Cy5          | G46-6       | BD Biosciences | Mouse IgG2a, $\kappa$ |
| TNF     | Alexa Fluor 700 | Mab11       | BD Biosciences | Mouse IgG1, $\kappa$  |
| iNOS    | Alexa Fluor 488 | 4E5         | Abcam          | Mouse IgG1            |
| IL-12   | PE              | C11.5       | BD Biosciences | Mouse IgG1            |
| ICAM-3  | FITC            | TU41        | BD Biosciences | Mouse IgG1, $\kappa$  |
| CD209   | PE-Cy7          | 9E9A8       | Biolegend      | Mouse IgG2a, $\kappa$ |
| CD206   | PE-Cy5          | 19.2        | BD Biosciences | Mouse IgG1, $\kappa$  |
| CD163   | PE-CF594        | GHI/61      | BD Biosciences | Mouse IgG1, $\kappa$  |
| IL-10   | PE              | JES3-9D7    | BD Biosciences | Rat IgG1              |
| NRP1    | APC             | 12C2        | Biolegend      | Mouse IgG2a, $\kappa$ |

\*Antibodies were labelled using the Alexa Fluor 488 Monoclonal Antibody Labeling Kit and Alexa Fluor 680. Antibody Labeling Kit (Life Technologies, Grand Island, NY, USA) following the manufacturer's instructions.

**Supplementary Table 3.** Antibodies used for mouse cell analysis.

| <b>Antigen</b> | <b>Fluorophore</b> | <b>Clone</b> | <b>Company</b> |
|----------------|--------------------|--------------|----------------|
| CD45           | APC                | 30-F11       | BD Biosciences |
| Ly6G           | APC Cy7            | 1A8          | BD Biosciences |
| F4/80          | PE                 | BM8          | eBioscience    |
| CD11b          | PECy7              | M1/70        | BD Biosciences |
| CD8            | PE                 | 53-67        | BD Biosciences |
| CD4            | APC                | RM4-5        | BD Biosciences |
| CD3            | FITC               | 17A2         | BD Biosciences |
| CD11b          | PE-CF594           | M1/70        | BD Horizon     |
| F4/80          | APC-eFluor 780     | BM8          | eBioscience    |
| Egr-2          | APC                | erongr2      | eBioscience    |
| Ym1/2          | Phycoerythrin      | EPR15263     | Abcam          |
| CD3            | APC-Cy7            | 145-2C11     | BD Biosciences |
| CD49b          | PE                 | DX5          | BD Biosciences |
| CD69           | PE-Cy7             | H1.2F3       | BD Biosciences |
| CD11c          | Alexa Fluor 488    | N418         | eBioscience    |
| CD11c          | PECy7              | HL3          | BD Biosciences |
| MHC class II   | AF700              | M5/114.15.2  | eBioscience    |

**Supplementary Table 4.** Genes assessed using RT<sup>2</sup> Profiler PCR Array Mouse Innate & Adaptive Immune Response, and RT<sup>2</sup> Profiler PCR Array Mouse Inflammatory Response & Autoimmunity.

| <b>RT<sup>2</sup> Profiler PCR Array Mouse Innate &amp; Adaptive Immune Response</b> |                |               |                                                      |
|--------------------------------------------------------------------------------------|----------------|---------------|------------------------------------------------------|
| <b>UniGene</b>                                                                       | <b>GenBank</b> | <b>Symbol</b> | <b>Description</b>                                   |
| Mm.330510                                                                            | NM_011318      | <i>Apcs</i>   | Serum amyloid P-component                            |
| Mm.19131                                                                             | NM_009778      | <i>C3</i>     | Complement component 3                               |
| Mm.247623                                                                            | NM_007577      | <i>C5ar1</i>  | Complement component 5a receptor 1                   |
| Mm.1051                                                                              | NM_009807      | <i>Casp1</i>  | Caspase 1                                            |
| Mm.867                                                                               | NM_011331      | <i>Ccl12</i>  | Chemokine (C-C motif) ligand 12                      |
| Mm.284248                                                                            | NM_013653      | <i>Ccl5</i>   | Chemokine (C-C motif) ligand 5                       |
| Mm.1337                                                                              | NM_009916      | <i>Ccr4</i>   | Chemokine (C-C motif) receptor 4                     |
| Mm.14302                                                                             | NM_009917      | <i>Ccr5</i>   | Chemokine (C-C motif) receptor 5                     |
| Mm.8007                                                                              | NM_009835      | <i>Ccr6</i>   | Chemokine (C-C motif) receptor 6                     |
| Mm.442098                                                                            | NM_007720      | <i>Ccr8</i>   | Chemokine (C-C motif) receptor 8                     |
| Mm.3460                                                                              | NM_009841      | <i>Cd14</i>   | CD14 antigen                                         |
| Mm.2209                                                                              | NM_013488      | <i>Cd4</i>    | CD4 antigen                                          |
| Mm.271833                                                                            | NM_011611      | <i>Cd40</i>   | CD40 antigen                                         |
| Mm.4861                                                                              | NM_011616      | <i>Cd40lg</i> | CD40 ligand                                          |
| Mm.89474                                                                             | NM_009855      | <i>Cd80</i>   | CD80 antigen                                         |
| Mm.1452                                                                              | NM_019388      | <i>Cd86</i>   | CD86 antigen                                         |
| Mm.1858                                                                              | NM_001081110   | <i>Cd8a</i>   | CD8 antigen, alpha chain                             |
| Mm.28767                                                                             | NM_007768      | <i>Crp</i>    | C-reactive protein, pentraxin-related                |
| Mm.4922                                                                              | NM_009969      | <i>Csf2</i>   | Colony stimulating factor 2 (granulocyte-macrophage) |
| Mm.877                                                                               | NM_021274      | <i>Cxcl10</i> | Chemokine (C-X-C motif) ligand 10                    |
| Mm.12876                                                                             | NM_009910      | <i>Cxcr3</i>  | Chemokine (C-X-C motif) receptor 3                   |
| Mm.86382                                                                             | NM_172689      | <i>Ddx58</i>  | DEAD (Asp-Glu-Ala-Asp) box polypeptide 58            |
| Mm.3355                                                                              | NM_010177      | <i>Fasl</i>   | Fas ligand (TNF superfamily, member 6)               |
| Mm.182291                                                                            | NM_054039      | <i>Foxp3</i>  | Forkhead box P3                                      |
| Mm.313866                                                                            | NM_008091      | <i>Gata3</i>  | GATA binding protein 3                               |

|           |           |               |                                            |
|-----------|-----------|---------------|--------------------------------------------|
| Mm.88795  | NM_010391 | <i>H2-Q10</i> | Histocompatibility 2, Q region locus 10    |
| Mm.439648 | NM_010398 | <i>H2-T23</i> | Histocompatibility 2, T region locus 23    |
| Mm.435508 | NM_010493 | <i>Icam1</i>  | Intercellular adhesion molecule 1          |
| Mm.14091  | NM_010503 | <i>Ifna2</i>  | Interferon alpha 2                         |
| Mm.502    | NM_010508 | <i>Ifnar1</i> | Interferon (alpha and beta) receptor 1     |
| Mm.1245   | NM_010510 | <i>Ifnb1</i>  | Interferon beta 1, fibroblast              |
| Mm.240327 | NM_008337 | <i>Ifng</i>   | Interferon gamma                           |
| Mm.549    | NM_010511 | <i>Ifngr1</i> | Interferon gamma receptor 1                |
| Mm.874    | NM_010548 | <i>Il10</i>   | Interleukin 10                             |
| Mm.1284   | NM_008355 | <i>Il13</i>   | Interleukin 13                             |
| Mm.5419   | NM_010552 | <i>Il17a</i>  | Interleukin 17A                            |
| Mm.1410   | NM_008360 | <i>Il18</i>   | Interleukin 18                             |
| Mm.15534  | NM_010554 | <i>Il1a</i>   | Interleukin 1 alpha                        |
| Mm.222830 | NM_008361 | <i>Il1b</i>   | Interleukin 1 beta                         |
| Mm.896    | NM_008362 | <i>Il1r1</i>  | Interleukin 1 receptor, type I             |
| Mm.14190  | NM_008366 | <i>Il2</i>    | Interleukin 2                              |
| Mm.125482 | NM_031252 | <i>Il23a</i>  | Interleukin 23, alpha subunit p19          |
| Mm.276360 | NM_021283 | <i>Il4</i>    | Interleukin 4                              |
| Mm.4461   | NM_010558 | <i>Il5</i>    | Interleukin 5                              |
| Mm.1019   | NM_031168 | <i>Il6</i>    | Interleukin 6                              |
| Mm.38241  | NM_008363 | <i>Irak1</i>  | Interleukin-1 receptor-associated kinase 1 |
| Mm.3960   | NM_016849 | <i>Irf3</i>   | Interferon regulatory factor 3             |
| Mm.3233   | NM_016850 | <i>Irf7</i>   | Interferon regulatory factor 7             |
| Mm.262106 | NM_008401 | <i>Itgam</i>  | Integrin alpha M                           |
| Mm.275839 | NM_008413 | <i>Jak2</i>   | Janus kinase 2                             |
| Mm.116844 | NM_016923 | <i>Ly96</i>   | Lymphocyte antigen 96                      |
| Mm.45436  | NM_017372 | <i>Lyz2</i>   | Lysozyme 2                                 |
| Mm.196581 | NM_011949 | <i>Mapk1</i>  | Mitogen-activated protein kinase 1         |
| Mm.21495  | NM_016700 | <i>Mapk8</i>  | Mitogen-activated protein kinase 8         |
| Mm.30045  | NM_010776 | <i>Mbl2</i>   | Mannose-binding lectin (protein C) 2       |

|           |           |                |                                                                                     |
|-----------|-----------|----------------|-------------------------------------------------------------------------------------|
| Mm.4668   | NM_010824 | <i>Mpo</i>     | Myeloperoxidase                                                                     |
| Mm.33996  | NM_010846 | <i>Mx1</i>     | Myxovirus (influenza virus) resistance 1                                            |
| Mm.213003 | NM_010851 | <i>Myd88</i>   | Myeloid differentiation primary response gene 88                                    |
| Mm.256765 | NM_008689 | <i>Nfkb1</i>   | Nuclear factor of kappa light polypeptide gene enhancer in B-cells 1, p105          |
| Mm.170515 | NM_010907 | <i>Nfkbia</i>  | Nuclear factor of kappa light polypeptide gene enhancer in B-cells inhibitor, alpha |
| Mm.54174  | NM_145827 | <i>Nlrp3</i>   | NLR family, pyrin domain containing 3                                               |
| Mm.28498  | NM_172729 | <i>Nod1</i>    | Nucleotide-binding oligomerization domain containing 1                              |
| Mm.222633 | NM_145857 | <i>Nod2</i>    | Nucleotide-binding oligomerization domain containing 2                              |
| Mm.828    | NM_009019 | <i>Rag1</i>    | Recombination activating gene 1                                                     |
| Mm.4372   | NM_011281 | <i>Rorc</i>    | RAR-related orphan receptor gamma                                                   |
| Mm.2913   | NM_013612 | <i>Slc11a1</i> | Solute carrier family 11 (proton-coupled divalent metal ion transporters), member 1 |
| Mm.277406 | NM_009283 | <i>Stat1</i>   | Signal transducer and activator of transcription 1                                  |
| Mm.249934 | NM_011486 | <i>Stat3</i>   | Signal transducer and activator of transcription 3                                  |
| Mm.1550   | NM_011487 | <i>Stat4</i>   | Signal transducer and activator of transcription 4                                  |
| Mm.121721 | NM_009284 | <i>Stat6</i>   | Signal transducer and activator of transcription 6                                  |
| Mm.477879 | NM_019507 | <i>Tbx21</i>   | T-box 21                                                                            |
| Mm.203952 | NM_174989 | <i>Ticam1</i>  | Toll-like receptor adaptor molecule 1                                               |
| Mm.273024 | NM_030682 | <i>Tlr1</i>    | Toll-like receptor 1                                                                |
| Mm.87596  | NM_011905 | <i>Tlr2</i>    | Toll-like receptor 2                                                                |
| Mm.33874  | NM_126166 | <i>Tlr3</i>    | Toll-like receptor 3                                                                |
| Mm.38049  | NM_021297 | <i>Tlr4</i>    | Toll-like receptor 4                                                                |
| Mm.116894 | NM_016928 | <i>Tlr5</i>    | Toll-like receptor 5                                                                |
| Mm.42146  | NM_011604 | <i>Tlr6</i>    | Toll-like receptor 6                                                                |
| Mm.23979  | NM_133211 | <i>Tlr7</i>    | Toll-like receptor 7                                                                |
| Mm.196676 | NM_133212 | <i>Tlr8</i>    | Toll-like receptor 8                                                                |
| Mm.44889  | NM_031178 | <i>Tlr9</i>    | Toll-like receptor 9                                                                |
| Mm.1293   | NM_013693 | <i>Tnf</i>     | Tumor necrosis factor                                                               |
| Mm.292729 | NM_009424 | <i>Traf6</i>   | Tnf receptor-associated factor 6                                                    |

|           |           |                 |                                                           |
|-----------|-----------|-----------------|-----------------------------------------------------------|
| Mm.20249  | NM_018793 | <i>Tyk2</i>     | Tyrosine kinase 2                                         |
| Mm.328431 | NM_007393 | <i>Actb</i>     | Actin, beta                                               |
| Mm.163    | NM_009735 | <i>B2m</i>      | Beta-2 microglobulin                                      |
| Mm.343110 | NM_008084 | <i>Gapdh</i>    | Glyceraldehyde-3-phosphate dehydrogenase                  |
| Mm.3317   | NM_010368 | <i>Gusb</i>     | Glucuronidase, beta                                       |
| Mm.2180   | NM_008302 | <i>Hsp90ab1</i> | Heat shock protein 90 alpha (cytosolic), class B member 1 |

---

**RT<sup>2</sup> Profiler PCR Array Mouse Inflammatory Response & Autoimmunity**


---

| UniGene   | GenBank   | Symbol       | Description                                 |
|-----------|-----------|--------------|---------------------------------------------|
| Mm.347398 | NM_009744 | <i>Bcl6</i>  | B-cell leukemia/lymphoma 6                  |
| Mm.19131  | NM_009778 | <i>C3</i>    | Complement component 3                      |
| Mm.2408   | NM_009779 | <i>C3ar1</i> | Complement component 3a receptor 1          |
| Mm.477109 | NM_009780 | <i>C4b</i>   | Complement component 4B (Chido blood group) |
| Mm.1283   | NM_011329 | <i>Ccl1</i>  | Chemokine (C-C motif) ligand 1              |
| Mm.4686   | NM_011330 | <i>Ccl11</i> | Chemokine (C-C motif) ligand 11             |
| Mm.867    | NM_011331 | <i>Ccl12</i> | Chemokine (C-C motif) ligand 12             |
| Mm.41988  | NM_011332 | <i>Ccl17</i> | Chemokine (C-C motif) ligand 17             |
| Mm.424740 | NM_011888 | <i>Ccl19</i> | Chemokine (C-C motif) ligand 19             |
| Mm.290320 | NM_011333 | <i>Ccl2</i>  | Chemokine (C-C motif) ligand 2              |
| Mm.116739 | NM_016960 | <i>Ccl20</i> | Chemokine (C-C motif) ligand 20             |
| Mm.12895  | NM_009137 | <i>Ccl22</i> | Chemokine (C-C motif) ligand 22             |
| Mm.31505  | NM_019577 | <i>Ccl24</i> | Chemokine (C-C motif) ligand 24             |
| Mm.7275   | NM_009138 | <i>Ccl25</i> | Chemokine (C-C motif) ligand 25             |
| Mm.1282   | NM_011337 | <i>Ccl3</i>  | Chemokine (C-C motif) ligand 3              |
| Mm.244263 | NM_013652 | <i>Ccl4</i>  | Chemokine (C-C motif) ligand 4              |
| Mm.284248 | NM_013653 | <i>Ccl5</i>  | Chemokine (C-C motif) ligand 5              |
| Mm.341574 | NM_013654 | <i>Ccl7</i>  | Chemokine (C-C motif) ligand 7              |
| Mm.42029  | NM_021443 | <i>Ccl8</i>  | Chemokine (C-C motif) ligand 8              |
| Mm.274927 | NM_009912 | <i>Ccr1</i>  | Chemokine (C-C motif) receptor 1            |
| Mm.6272   | NM_009915 | <i>Ccr2</i>  | Chemokine (C-C motif) receptor 2            |

|           |           |               |                                              |
|-----------|-----------|---------------|----------------------------------------------|
| Mm.57050  | NM_009914 | <i>Ccr3</i>   | Chemokine (C-C motif) receptor 3             |
| Mm.1337   | NM_009916 | <i>Ccr4</i>   | Chemokine (C-C motif) receptor 4             |
| Mm.2932   | NM_007719 | <i>Ccr7</i>   | Chemokine (C-C motif) receptor 7             |
| Mm.3460   | NM_009841 | <i>Cd14</i>   | CD14 antigen                                 |
| Mm.271833 | NM_011611 | <i>Cd40</i>   | CD40 antigen                                 |
| Mm.4861   | NM_011616 | <i>Cd40lg</i> | CD40 ligand                                  |
| Mm.439656 | NM_009883 | <i>Cebpb</i>  | CCAAT/enhancer binding protein (C/EBP), beta |
| Mm.28767  | NM_007768 | <i>Crp</i>    | C-reactive protein, pentraxin-related        |
| Mm.795    | NM_007778 | <i>Csf1</i>   | Colony stimulating factor 1 (macrophage)     |
| Mm.21013  | NM_008176 | <i>Cxcl1</i>  | Chemokine (C-X-C motif) ligand 1             |
| Mm.877    | NM_021274 | <i>Cxcl10</i> | Chemokine (C-X-C motif) ligand 10            |
| Mm.131723 | NM_019494 | <i>Cxcl11</i> | Chemokine (C-X-C motif) ligand 11            |
| Mm.4979   | NM_009140 | <i>Cxcl2</i>  | Chemokine (C-X-C motif) ligand 2             |
| Mm.244289 | NM_203320 | <i>Cxcl3</i>  | Chemokine (C-X-C motif) ligand 3             |
| Mm.4660   | NM_009141 | <i>Cxcl5</i>  | Chemokine (C-X-C motif) ligand 5             |
| Mm.766    | NM_008599 | <i>Cxcl9</i>  | Chemokine (C-X-C motif) ligand 9             |
| Mm.337035 | NM_178241 | <i>Cxcr1</i>  | Chemokine (C-X-C motif) receptor 1           |
| Mm.234466 | NM_009909 | <i>Cxcr2</i>  | Chemokine (C-X-C motif) receptor 2           |
| Mm.1401   | NM_009911 | <i>Cxcr4</i>  | Chemokine (C-X-C motif) receptor 4           |
| Mm.3355   | NM_010177 | <i>Fasl</i>   | Fas ligand (TNF superfamily, member 6)       |
| Mm.246513 | NM_010234 | <i>Fos</i>    | FBJ osteosarcoma oncogene                    |
| Mm.240327 | NM_008337 | <i>Ifng</i>   | Interferon gamma                             |
| Mm.874    | NM_010548 | <i>Il10</i>   | Interleukin 10                               |
| Mm.4154   | NM_008349 | <i>Il10rb</i> | Interleukin 10 receptor, beta                |
| Mm.5419   | NM_010552 | <i>Il17a</i>  | Interleukin 17A                              |
| Mm.1410   | NM_008360 | <i>Il18</i>   | Interleukin 18                               |
| Mm.15534  | NM_010554 | <i>Il1a</i>   | Interleukin 1 alpha                          |
| Mm.222830 | NM_008361 | <i>Il1b</i>   | Interleukin 1 beta                           |
| Mm.896    | NM_008362 | <i>Il1r1</i>  | Interleukin 1 receptor, type I               |
| Mm.253424 | NM_008364 | <i>Il1rap</i> | Interleukin 1 receptor accessory protein     |

|           |           |              |                                                                            |
|-----------|-----------|--------------|----------------------------------------------------------------------------|
| Mm.882    | NM_031167 | <i>Il1rn</i> | Interleukin 1 receptor antagonist                                          |
| Mm.103585 | NM_016971 | <i>Il22</i>  | Interleukin 22                                                             |
| Mm.125482 | NM_031252 | <i>Il23a</i> | Interleukin 23, alpha subunit p19                                          |
| Mm.221227 | NM_144548 | <i>Il23r</i> | Interleukin 23 receptor                                                    |
| Mm.4461   | NM_010558 | <i>Il5</i>   | Interleukin 5                                                              |
| Mm.1019   | NM_031168 | <i>Il6</i>   | Interleukin 6                                                              |
| Mm.2856   | NM_010559 | <i>Il6ra</i> | Interleukin 6 receptor, alpha                                              |
| Mm.3825   | NM_008371 | <i>Il7</i>   | Interleukin 7                                                              |
| Mm.3006   | NM_008373 | <i>Il9</i>   | Interleukin 9                                                              |
| Mm.1137   | NM_008404 | <i>Itgb2</i> | Integrin beta 2                                                            |
| Mm.2160   | NM_023125 | <i>Knk1</i>  | Kininogen 1                                                                |
| Mm.87787  | NM_010735 | <i>Lta</i>   | Lymphotoxin A                                                              |
| Mm.1715   | NM_008518 | <i>Ltb</i>   | Lymphotoxin B                                                              |
| Mm.116844 | NM_016923 | <i>Ly96</i>  | Lymphocyte antigen 96                                                      |
| Mm.213003 | NM_010851 | <i>Myd88</i> | Myeloid differentiation primary response gene 88                           |
| Mm.256765 | NM_008689 | <i>Nfkb1</i> | Nuclear factor of kappa light polypeptide gene enhancer in B-cells 1, p105 |
| Mm.2893   | NM_010927 | <i>Nos2</i>  | Nitric oxide synthase 2, inducible                                         |
| Mm.129481 | NM_008173 | <i>Nr3c1</i> | Nuclear receptor subfamily 3, group C, member 1                            |
| Mm.292547 | NM_011198 | <i>Ptgs2</i> | Prostaglandin-endoperoxide synthase 2                                      |
| Mm.112765 | NM_138952 | <i>Ripk2</i> | Receptor (TNFRSF)-interacting serine-threonine kinase 2                    |
| Mm.5245   | NM_011345 | <i>Sele</i>  | Selectin, endothelial cell                                                 |
| Mm.23987  | NM_054096 | <i>Tirap</i> | Toll-interleukin 1 receptor (TIR) domain-containing adaptor protein        |
| Mm.273024 | NM_030682 | <i>Tlr1</i>  | Toll-like receptor 1                                                       |
| Mm.87596  | NM_011905 | <i>Tlr2</i>  | Toll-like receptor 2                                                       |
| Mm.33874  | NM_126166 | <i>Tlr3</i>  | Toll-like receptor 3                                                       |
| Mm.38049  | NM_021297 | <i>Tlr4</i>  | Toll-like receptor 4                                                       |
| Mm.116894 | NM_016928 | <i>Tlr5</i>  | Toll-like receptor 5                                                       |
| Mm.42146  | NM_011604 | <i>Tlr6</i>  | Toll-like receptor 6                                                       |
| Mm.23979  | NM_133211 | <i>Tlr7</i>  | Toll-like receptor 7                                                       |

|           |           |                 |                                                           |
|-----------|-----------|-----------------|-----------------------------------------------------------|
| Mm.44889  | NM_031178 | <i>Tlr9</i>     | Toll-like receptor 9                                      |
| Mm.1293   | NM_013693 | <i>Tnf</i>      | Tumor necrosis factor                                     |
| Mm.483369 | NM_019418 | <i>Tnfsf14</i>  | Tumor necrosis factor (ligand) superfamily, member 14     |
| Mm.103551 | NM_023764 | <i>Tollip</i>   | Toll interacting protein                                  |
| Mm.328431 | NM_007393 | <i>Actb</i>     | Actin, beta                                               |
| Mm.163    | NM_009735 | <i>B2m</i>      | Beta-2 microglobulin                                      |
| Mm.343110 | NM_008084 | <i>Gapdh</i>    | Glyceraldehyde-3-phosphate dehydrogenase                  |
| Mm.3317   | NM_010368 | <i>Gusb</i>     | Glucuronidase, beta                                       |
| Mm.2180   | NM_008302 | <i>Hsp90ab1</i> | Heat shock protein 90 alpha (cytosolic), class B member 1 |

---

**Supplementary Table 5.** Genes analyzed by TaqMan® gene expression assay.

| <b>Gene name</b>                                          | <b>Gene Symbol</b> | <b>Assay ID</b> |
|-----------------------------------------------------------|--------------------|-----------------|
| Actin, beta                                               | <i>Actb</i>        | Mm04394036_g1   |
| Glyceraldehyde-3-phosphate dehydrogenase                  | <i>Gapdh</i>       | Mm99999915_g1   |
| Glucuronidase, beta                                       | <i>Gusb</i>        | Mm01197698_m1   |
| Heat shock protein 90 alpha (cytosolic), class B member 1 | <i>Hsp90ab1</i>    | Mm00833431_g1   |
| Absent in melanoma 2                                      | <i>Aim2</i>        | Mm01295719_m1   |
| Arginase, liver                                           | <i>Arg1</i>        | Mm00475988_m1   |
| Caspase 1                                                 | <i>Casp1</i>       | Mm00438023_m1   |
| Chemokine (C-C motif) ligand 2                            | <i>Ccl2</i>        | Mm00441242_m1   |
| Chemokine (C-C motif) ligand 3                            | <i>Ccl3</i>        | Mm00441259_g1   |
| Chemokine (C-C motif) ligand 5                            | <i>Ccl5</i>        | Mm01302427_m1   |
| Chemokine (C-C motif) ligand 17                           | <i>Ccl17</i>       | Mm01244826_g1   |
| Chemokine (C-C motif) ligand 22                           | <i>Ccl22</i>       | Mm00436439_m1   |
| Chitinase-like 3                                          | <i>Chil3/Ym1</i>   | Mm00657889_mH   |
| Chemokine (C-X-C motif) ligand 1                          | <i>Cxcl1</i>       | Mm04207460_m1   |
| Chemokine (C-X-C motif) ligand 9                          | <i>Cxcl9</i>       | Mm00434946_m1   |
| Chemokine (C-X-C motif) ligand 10                         | <i>Cxcl10</i>      | Mm00445235_m1   |
| CD3 antigen, epsilon polypeptide                          | <i>Cd3e</i>        | Mm01179194_m1   |
| Cytotoxic T-lymphocyte-associated protein 4               | <i>Ctla4</i>       | Mm00486849_m1   |
| High mobility group box 1                                 | <i>Hmgb1</i>       | Mm00849805_gH   |
| Interleukin 1 alpha                                       | <i>Il1a</i>        | Mm00439620_m1   |
| Interleukin 1 beta                                        | <i>Il1b</i>        | Mm00434228_m1   |
| Interleukin 2                                             | <i>Il2</i>         | Mm00434256_m1   |
| Interleukin 3                                             | <i>Il3</i>         | Mm00439631_m1   |
| Interleukin 4                                             | <i>Il4</i>         | Mm00445259_m1   |
| Interleukin 5                                             | <i>Il5</i>         | Mm00439646_m1   |
| Interleukin 6                                             | <i>Il6</i>         | Mm00446190_m1   |
| Interleukin 9                                             | <i>Il9</i>         | Mm00434305_m1   |
| Interleukin 10                                            | <i>Il10</i>        | Mm01288386_m1   |
| Interleukin 12b (IL12p40)                                 | <i>Il12</i>        | Mm01288989_m1   |
| Interleukin 17a                                           | <i>Il17a</i>       | Mm00439618_m1   |
| Interleukin 18                                            | <i>Il18</i>        | Mm00434226_m1   |
| Interleukin 23                                            | <i>Il23</i>        | Mm00518984_m1   |
| Interleukin 33                                            | <i>Il33</i>        | Mm00505403_m1   |
| Intercellular adhesion molecule 1                         | <i>Icam1</i>       | Mm00516023_m1   |
| Intercellular adhesion molecule 2                         | <i>Icam2</i>       | Mm00494862_m1   |
| Interferon gamma                                          | <i>Ifng</i>        | Mm01168134_m1   |

|                                                        |                          |               |
|--------------------------------------------------------|--------------------------|---------------|
| Antigen identified by monoclonal antibody Ki 67        | <i>Mki67 (Ki-67)</i>     | Mm01278617_m1 |
| NLR family, CARD domain containing 4                   | <i>Nlrc4</i>             | Mm01233151_m1 |
| NLR family, pyrin domain containing 1A                 | <i>Nlrp1a</i>            | Mm03047263_m1 |
| NLR family, pyrin domain containing 3                  | <i>Nlrp3</i>             | Mm00840904_m1 |
| Nucleotide-binding oligomerization domain containing 1 | <i>Nod1</i>              | Mm00805062_m1 |
| Nucleotide-binding oligomerization domain containing 2 | <i>Nod2</i>              | Mm00467543_m1 |
| Programmed cell death 1                                | <i>Pdcd1</i>             | Mm01285676_m1 |
| PYD and CARD domain containing                         | <i>Pycard</i>            | Mm00445747_g1 |
| SR-related CTD-associated factor 11                    | <i>Scaf11 (Casp11)</i>   | Mm01297328_m1 |
| Selectin; endothelial cell                             | <i>Sele (E-selectin)</i> | Mm00441278_m1 |
| Selectin, lymphocyte                                   | <i>Sell (L-selectin)</i> | Mm00441291_m1 |
| Transforming growth factor, beta 1                     | <i>Tgfb1</i>             | Mm01178820_m1 |
| Tumor necrosis factor                                  | <i>Tnf</i>               | Mm00443258_m1 |
| Vascular cell adhesion molecule 1                      | <i>Vcam1</i>             | Mm01320970_m1 |

---
